# Supplementary material for: RNA versus DNA G‐Quadruplex: The Origin of Increased Stability
Source: PubMed Central journal article supplement — Chemistry. 2018 Oct 23;24(61):16315–22. doi: 10.1002/chem.201803530 (PMC6282516; doi:10.1002/chem.201803530), 2018-10-23
Supplement: CHEM-24-16315-s001.pdf [file CHEM-24-16315-s001.pdf]

# CHEMISTRY

## A **European** Journal

### Supporting Information

#### **RNA versus DNA G-Quadruplex: The Origin of Increased Stability**

Francesco Zaccaria<sup>[a]</sup> and Célia Fonseca Guerra<sup>\*[a, b]</sup>

chem\_201803530\_sm\_miscellaneous\_information.pdf

## Supporting Information for

# RNA vs DNA G-Quadruplex: the origin of increased stability

F. Zaccaria,<sup>1</sup> C. Fonseca Guerra<sup>1, 2\*</sup>

1) Department of Theoretical Chemistry and Amsterdam Center for Multiscale Modeling, Vrije Universiteit

2) Leiden Institute of Chemistry, Gorlaeus Laboratories Leiden University, P.O. Box 9502, 2300 RA Leiden, The Netherlands t Amsterdam, De Boelelaan 1083, 1081 HV Amsterdam (The Netherlands).

\* To whom correspondence should be addressed.; Email: [c.fonsecaquerra@vu.nl](mailto:c.fonsecaquerra@vu.nl)

**Table S1** Partitioning of the bond energy energy (kcal/mol) of the final complex from the empty scaffold + cation with 4 Na<sup>+</sup> as counterions

**Figure S1.** Energy plot of the conformational search over 600 possible conformers of RNA dimer (a) and DNA dimer (b). (Energy expressed in Hartrees)

**Table S2** Partitioning of the bonding energy upon formation of the final GQ-M<sup>+</sup> complex from the empty scaffold

**Table S3** Energy Decomposition Analysis of the interaction energy (kcal/mol) between the alkali-metal cations and the empty scaffold

**Table S4** Energy decomposition analysis of  $\Delta E_{\text{int}}$  of 8 H<sub>2</sub>O or 8 H<sub>2</sub> molecules interacting with K<sup>+</sup>.

**Table S5** Cartesian coordinates (in Å) and ADF total bonding energies (in kcal/mol) of RNA GQ-M<sup>+</sup> at the COSMO ZORA-BLYP-D3(BJ)/TZ2P level of theory.

**Table S6** Cartesian coordinates (in Å) and ADF total bonding energies (in kcal/mol) of guanosine dimer (guanosine monophosphate + guanosine), guanosine dimer counterion (Na<sup>+</sup>) and (H<sub>2</sub>CO)<sub>8</sub> at the COSMO ZORA-BLYP-D3(BJ)/TZ2P level of theory.

**Table S1.** Partitioning of the formation energy (kcal/mol) of the final complex from 4 Guanosine dimers with 4 Na<sup>+</sup> as counterions

| System                            | M <sup>+</sup>  | $\Delta E_{\text{Bond}}$ | $\Delta E_{\text{desolv}}$ | $\Delta E_{\text{prep}}$ | $\Delta E_{\text{int}}$ | $\Delta E_{\text{solv}}$ | $\Delta E_{\text{desolv}}$ |
|-----------------------------------|-----------------|--------------------------|----------------------------|--------------------------|-------------------------|--------------------------|----------------------------|
|                                   |                 |                          |                            |                          |                         |                          | $+\Delta E_{\text{solv}}$  |
| RNA <sub>GQ</sub> -M <sup>+</sup> | Na <sup>+</sup> | -125.8                   | 314.3                      | 9.4                      | -171.1                  | -208.0                   | 106.3                      |
|                                   | K <sup>+</sup>  | -126.7                   | 296.6                      | 4.6                      | -149.0                  | -208.5                   | 88.2                       |

**Figure S1.** Energy plots of the conformational search over 600 possible conformers of RNA dimer (a) and DNA dimer (b). (UFF energy expressed in Hartree). ADF "conformers" module generates 600 random conformations and filters them with an RMS (0.2 Å) filter to avoid duplicate structures. Next it optimizes with RDKit-UFF so each conformation runs into some local minimum (conformer), and again filters with an RMS filter (0.1 Å) to avoid duplicate structures. The two geometries of minimum energy have been furtherly optimized at the COSMO ZORA-BLYP-D3(BJ)/TZ2P level of theory. The conformation for G-DNA optimized through this procedure confirmed our previous obtained geometry for G-DNA published in PCCP (F. Zaccaria, G. Paragi, C. Fonseca Guerra, *Phys. Chem. Chem. Phys.* **2016**, *18*, 20895–20904.)

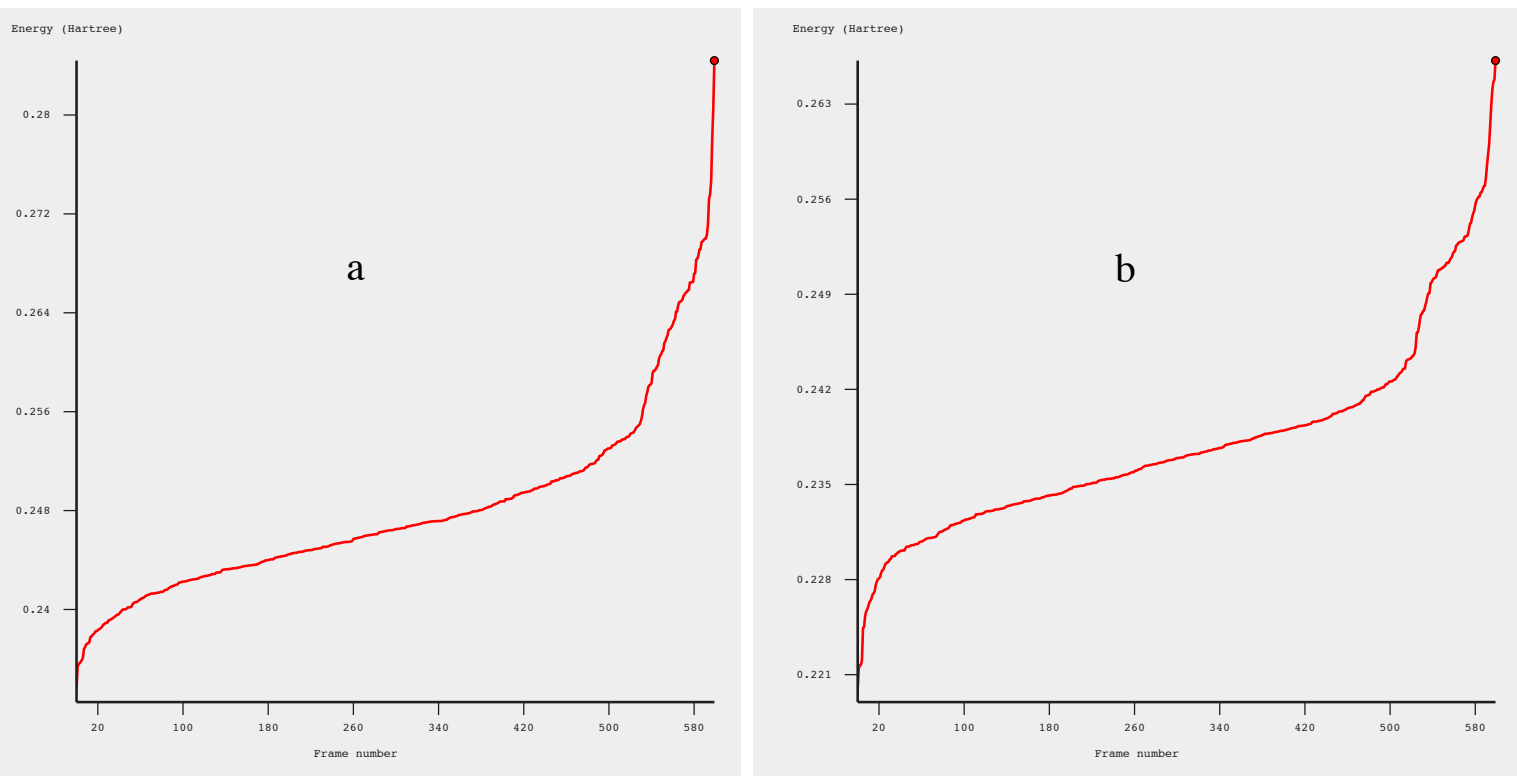

**Table S2.** Partitioning of the bonding energy upon formation of the final GQ-M<sup>+</sup> complex from the empty scaffold (kcal/mol)<sup>[a]</sup>

|           | M <sup>+</sup>  | $\Delta E_{\text{Bond}}$ | $\Delta E_{\text{Dehyd}}$ | $\Delta E_{\text{prep}}$ | $\Delta E_{\text{int}}$ | $\Delta E_{\text{Hyd}}$ | $\Delta E_{\text{Dehyd+Hyd}}$ |
|-----------|-----------------|--------------------------|---------------------------|--------------------------|-------------------------|-------------------------|-------------------------------|
| RNA.GQ[ ] | Li <sup>+</sup> | -37.1                    | 272.7                     | 9.8                      | -173.4                  | -146.2                  | 126.5                         |
|           | Na <sup>+</sup> | -51.3                    | 246.7                     | 9.6                      | -161.8                  | -145.8                  | 100.9                         |
|           | K <sup>+</sup>  | -51.7                    | 229.0                     | 5.8                      | -139.0                  | -147.5                  | 81.5                          |
|           | Rb <sup>+</sup> | -46.3                    | 224.9                     | 4.6                      | -126.9                  | -149.0                  | 75.9                          |
|           | Cs <sup>+</sup> | -38.6                    | 218.9                     | 5.5                      | -112.4                  | -150.7                  | 68.3                          |
| DNA.GQ[ ] | Li <sup>+</sup> | -37.9                    | 251.8                     | 11.3                     | -165.7                  | -135.2                  | 116.5                         |
|           | Na <sup>+</sup> | -52.2                    | 225.8                     | 10.4                     | -156.6                  | -131.8                  | 94.0                          |
|           | K <sup>+</sup>  | -53.2                    | 208.1                     | 5.7                      | -134.7                  | -132.2                  | 75.9                          |
|           | Rb <sup>+</sup> | -48.8                    | 204.0                     | 0.9                      | -119.1                  | -134.6                  | 69.4                          |
|           | Cs <sup>+</sup> | -40.9                    | 198.1                     | 1.8                      | -104.4                  | -136.3                  | 61.7                          |

[a] Energies and geometries computed at ZORA-BLYP-D3(BJ)/TZ2P level of theory.

**Table S3.** Energy Decomposition Analysis of the interaction energy (kcal/mol) between the alkali-metal cations and the empty scaffold.<sup>[a]</sup>

|           | M <sup>+</sup>  | $\Delta E_{\text{int}}^2$ | $\Delta E_{\text{Pauli}}^2$ | $\Delta V_{\text{elstat}}^2$ | $\Delta E_{\text{oi}}^2$ | $\Delta E_{\text{disp}}^2$ |
|-----------|-----------------|---------------------------|-----------------------------|------------------------------|--------------------------|----------------------------|
| RNA.GQ[ ] | Li <sup>+</sup> | -173.4                    | 12.5                        | -120.3                       | -57.9                    | -7.8                       |
|           | Na <sup>+</sup> | -161.8                    | 11.2                        | -114.7                       | -45.3                    | -13.1                      |
|           | K <sup>+</sup>  | -138.9                    | 28.9                        | -109.6                       | -43.0                    | -15.2                      |
|           | Rb <sup>+</sup> | -126.5                    | 36.5                        | -103.8                       | -40.7                    | -16.4                      |
|           | Cs <sup>+</sup> | -112.1                    | 39.4                        | -95.8                        | -39.6                    | -16.1                      |
| DNA.GQ[ ] | Li <sup>+</sup> | -165.7                    | 13.2                        | -112.8                       | -58.3                    | -7.7                       |
|           | Na <sup>+</sup> | -156.6                    | 11.1                        | -109.3                       | -45.2                    | -13.1                      |
|           | K <sup>+</sup>  | -134.7                    | 29.9                        | -106.2                       | -43.2                    | -15.2                      |
|           | Rb <sup>+</sup> | -119.1                    | 35.2                        | -97.1                        | -40.9                    | -16.5                      |
|           | Cs <sup>+</sup> | -104.4                    | 39.1                        | -88.0                        | -39.4                    | -16.1                      |

[a] Energies computed at ZORA-BLYP-D3(BJ)/TZ2P level of theory.

**Table S4.** Energy decomposition analysis of  $\Delta E_{\text{int}}$  of 8 H<sub>2</sub>O or 8 H<sub>2</sub> molecules interacting with K<sup>+</sup>. -OH moieties are frozen in the same geometry they assume in Ribosidic 2'-OH RNA-GQ-K<sup>+</sup> complex (Figure 9a), while the second H is fully relaxed. In the H<sub>2</sub> case, the oxygens of the ribosidic 2'-OH in RNA-GQ-K<sup>+</sup> complex are replaced at exactly the same position in space by hydrogens (Figure 9b), and the position of the second hydrogen atom is optimized.

| System           | M <sup>+</sup> | $\Delta E_{\text{int}}$ | $\Delta E_{\text{Pauli}}$ | $\Delta V_{\text{elstat}}$ | $\Delta E_{\text{oi}}$ | $\Delta E_{\text{disp}}$ |
|------------------|----------------|-------------------------|---------------------------|----------------------------|------------------------|--------------------------|
| H <sub>2</sub> O | K <sup>+</sup> | -11.3                   | 0.0                       | -11.0                      | -0.3                   | -0.1                     |
| H <sub>2</sub>   | K <sup>+</sup> | -0.4                    | 0.0                       | -0.2                       | -0.1                   | -0.1                     |

Energies and geometries computed at ZORA-BLYP-D3(BJ)/TZ2P level of theory (gasphase).

**Table S5.** Relationship between the term  $\Delta E_{\text{desolv}} + \Delta E_{\text{solv}}$  and  $\Delta G_{\text{hyd}}$  of involved cations

| System                | M <sup>+</sup>  | $\Delta E_{\text{desolv}} + \Delta E_{\text{solv}}$ | System                | M <sup>+</sup>  | $\Delta E_{\text{desolv}} + \Delta E_{\text{solv}}$ | Experimental <sup>a</sup><br>$\Delta G_{\text{hyd}}$ |
|-----------------------|-----------------|-----------------------------------------------------|-----------------------|-----------------|-----------------------------------------------------|------------------------------------------------------|
| RNA GQ-M <sup>+</sup> | Li <sup>+</sup> | 126.5                                               | DNA GQ-M <sup>+</sup> | Li <sup>+</sup> | 116.5                                               | -113.4                                               |
|                       | Na <sup>+</sup> | 100.9                                               |                       | Na <sup>+</sup> | 94.0                                                | -87.2                                                |
|                       | K <sup>+</sup>  | 81.5                                                |                       | K <sup>+</sup>  | 75.9                                                | -70.5                                                |
|                       | Rb <sup>+</sup> | 75.9                                                |                       | Rb <sup>+</sup> | 69.4                                                | -65.7                                                |
|                       | Cs <sup>+</sup> | 68.3                                                |                       | Cs <sup>+</sup> | 61.7                                                | -59.7                                                |

[a] Marcus, Y. (1991). Thermodynamics of Solvation of Ions, 87(18), 2995–2999

As it becomes apparent in Table S5, the difference between desolvation of the empty scaffold individually optimized plus the ion and rehydration of the fully optimized GQ-M<sup>+</sup> complex follows the  $\Delta G_{\text{Hyd}}$  of concerned cations, so both the DNA and RNA complexes are affected by the screening effect generated by the COSMO solvation to the same extent. For this reason, although the gasphase picture overestimates the electrostatic attraction exerted by 2'-OHs over the involved cations, we can assume that the same effect concerns both models b and c in Fig. 8 (simplified models of RNA GQ-K<sup>+</sup> complex where 2-OHs are substituted by H<sub>2</sub>O or H<sub>2</sub>) in such a way that their comparison offers a valid prediction of the differences in terms of  $\Delta V_{\text{elstat}}$ .

**Table S6.** Cartesian coordinates (in Å) and ADF total bonding energies (in kcal/mol) of RNA GQ-M<sup>+</sup> at the COSMO ZORA-BLYP-D3(BJ)/TZ2P level of theory.

| RNA GQ (Bond Energy: -39418.23) (symmetry C2) |            |           |           |
|-----------------------------------------------|------------|-----------|-----------|
| 1.C                                           | -4.841032  | -4.585151 | 1.427223  |
| 2.N                                           | -3.639077  | -4.046266 | 1.500392  |
| 3.C                                           | -3.846593  | -2.669167 | 1.548203  |
| 4.C                                           | -2.923026  | -1.584300 | 1.612431  |
| 5.O                                           | -1.677766  | -1.639309 | 1.683388  |
| 6.N                                           | -3.581671  | -0.331710 | 1.596406  |
| 7.C                                           | -4.952986  | -0.159647 | 1.616025  |
| 8.N                                           | -5.447017  | 1.095056  | 1.688094  |
| 9.N                                           | -5.815225  | -1.185205 | 1.591219  |
| 10.C                                          | -5.214559  | -2.383083 | 1.532440  |
| 11.H                                          | -8.893540  | -6.943211 | 3.163517  |
| 12.H                                          | -10.026786 | -7.132350 | 1.804308  |
| 13.H                                          | -9.864029  | -4.794085 | 2.481003  |
| 14.H                                          | -9.679473  | -5.590898 | -0.226283 |
| 15.H                                          | -7.246470  | -5.376073 | -0.124629 |
| 16.O                                          | -7.553471  | -3.547213 | -1.078758 |
| 17.H                                          | -7.696016  | -2.769975 | 1.431431  |
| 18.H                                          | -5.060066  | -5.641959 | 1.370803  |
| 19.H                                          | -2.952149  | 0.498729  | 1.601626  |
| 20.H                                          | -4.870248  | 1.945884  | 1.575205  |
| 21.H                                          | -6.446849  | 1.173257  | 1.522799  |
| 22.P                                          | -10.559134 | -2.759648 | -0.830675 |
| 23.O                                          | -12.125375 | -2.541482 | -0.596423 |
| 24.O                                          | -10.132207 | -3.333057 | -2.140993 |
| 25.O                                          | -10.005035 | -1.265207 | -0.656224 |
| 26.C                                          | -10.255728 | -0.472307 | 0.572374  |
| 27.C                                          | 0.690750   | 3.243043  | -2.044596 |
| 28.C                                          | -9.820281  | 0.967439  | 0.356414  |
| 29.O                                          | -8.364963  | 1.055568  | 0.304493  |
| 30.C                                          | -10.344683 | 1.657922  | -0.928026 |
| 31.O                                          | -10.764007 | 3.015975  | -0.683426 |
| 32.C                                          | -9.149188  | 1.580277  | -1.914940 |
| 33.C                                          | -7.928698  | 1.638455  | -0.950039 |

|       |            |            |           |
|-------|------------|------------|-----------|
| 34.C  | 3.846593   | 2.669167   | 1.548203  |
| 35.N  | -6.739992  | 0.935738   | -1.377554 |
| 36.C  | 2.923026   | 1.584300   | 1.612431  |
| 37.H  | 4.615479   | 2.449372   | -1.797435 |
| 38.N  | 2.070049   | 2.944383   | -1.955411 |
| 39.N  | 1.094568   | 5.449651   | 1.696418  |
| 40.H  | 5.068309   | 4.118920   | -1.568756 |
| 41.C  | 3.071751   | 3.882612   | -1.773092 |
| 42.O  | 0.418512   | 9.181040   | -2.742467 |
| 43.O  | -0.140701  | 2.345611   | -2.301209 |
| 44.H  | 2.442669   | 9.138009   | -2.575826 |
| 45.C  | -7.765842  | -4.418329  | 0.022882  |
| 46.N  | -3.618596  | 5.854340   | 1.446968  |
| 47.H  | -1.149387  | 7.359226   | -1.260132 |
| 48.H  | -0.498684  | 11.327912  | 0.804945  |
| 49.H  | 1.154229   | 11.215791  | -1.337847 |
| 50.O  | 7.553471   | 3.547213   | -1.078758 |
| 51.C  | -6.568221  | -0.446401  | -1.468965 |
| 52.N  | -5.321596  | -0.769119  | -1.748809 |
| 53.O  | -1.641432  | 1.682350   | 1.688147  |
| 54.C  | -0.160333  | 4.956851   | 1.620560  |
| 55.C  | -6.737304  | 9.048595   | 2.099654  |
| 56.N  | -0.333205  | 3.585791   | 1.597665  |
| 57.C  | -7.275267  | -3.777803  | 1.330643  |
| 58.C  | 1.511870   | 5.488253   | -1.591163 |
| 59.O  | 1.677766   | 1.639309   | 1.683388  |
| 60.H  | 7.193636   | 7.271831   | 1.703231  |
| 61.N  | 3.639077   | 4.046266   | 1.500392  |
| 62.N  | -1.185543  | 5.819447   | 1.595493  |
| 63.C  | -2.383677  | 5.219608   | 1.531882  |
| 64.N  | 4.348608   | 3.452557   | -1.820617 |
| 65.O  | 7.426319   | -8.060164  | 1.299836  |
| 66.C  | 6.737304   | -9.048595  | 2.099654  |
| 67.C  | 5.227251   | -9.058624  | 1.884899  |
| 68.O  | 4.660281   | -7.779807  | 2.354313  |
| 69.C  | 4.768447   | -9.216041  | 0.419429  |
| 70.O  | 3.568123   | -10.080124 | 0.466784  |
| 71.C  | 4.419550   | -7.773368  | 0.022603  |
| 72.C  | 3.776573   | -7.281520  | 1.328874  |
| 73.N  | 3.618596   | -5.854340  | 1.446968  |
| 74.C  | 4.585574   | -4.847119  | 1.422705  |
| 75.N  | 4.047454   | -3.644893  | 1.496112  |
| 76.C  | 2.670412   | -3.851733  | 1.546563  |
| 77.C  | 1.586184   | -2.927653  | 1.614022  |
| 78.O  | 1.641432   | -1.682350  | 1.688147  |
| 79.N  | 0.333205   | -3.585791  | 1.597665  |
| 80.C  | 0.160333   | -4.956851  | 1.620560  |
| 81.N  | -1.094568  | -5.449651  | 1.696418  |
| 82.N  | 1.185543   | -5.819447  | 1.595493  |
| 83.C  | 2.383677   | -5.219608  | 1.531882  |
| 84.H  | 6.941924   | -8.892831  | 3.165799  |
| 85.H  | 7.136944   | -10.023867 | 1.805713  |
| 86.H  | 4.798275   | -9.871257  | 2.482082  |
| 87.H  | 5.510601   | -9.688451  | -0.223519 |
| 88.H  | 5.378080   | -7.255053  | -0.123027 |
| 89.O  | 3.552104   | -7.558916  | -1.081745 |
| 90.H  | 2.768020   | -7.700950  | 1.427141  |
| 91.H  | 5.642214   | -5.066161  | 1.362945  |
| 92.H  | -0.496793  | -2.956101  | 1.601080  |
| 93.H  | -1.944639  | -4.872077  | 1.581057  |
| 94.H  | -1.174051  | -6.449618  | 1.533674  |
| 95.P  | 2.754024   | -10.562642 | -0.825038 |
| 96.O  | 2.531443   | -12.128905 | -0.598326 |
| 97.O  | 3.323825   | -10.130785 | -2.135621 |
| 98.O  | 1.262127   | -10.004888 | -0.643710 |
| 99.C  | 0.467459   | -10.258932 | 0.582930  |
| 100.C | -0.970289  | -9.818079  | 0.364332  |
| 101.O | -1.051873  | -8.362637  | 0.310344  |
| 102.C | -1.659416  | -10.342134 | -0.921501 |
| 103.O | -3.017282  | -10.762662 | -0.679163 |
| 104.C | -1.579925  | -9.146173  | -1.907883 |
| 105.C | -1.637654  | -7.926115  | -0.942769 |
| 106.N | -0.935523  | -6.737334  | -1.370421 |
| 107.C | 0.446592   | -6.565269  | -1.460135 |
| 108.N | 0.769415   | -5.318247  | -1.737816 |
| 109.C | -0.436122  | -4.624175  | -1.816075 |
| 110.C | -0.690750  | -3.243043  | -2.044596 |
| 111.O | 0.140701   | -2.345611  | -2.301209 |
| 112.N | -2.070049  | -2.944383  | -1.955411 |
| 113.C | -3.071751  | -3.882612  | -1.773092 |
| 114.N | -4.348608  | -3.452557  | -1.820617 |
| 115.N | -2.823220  | -5.188598  | -1.586003 |
| 116.C | -1.511870  | -5.488253  | -1.591163 |
| 117.H | 0.920704   | -9.688747  | 1.396859  |
| 118.H | 0.498684   | -11.327912 | 0.804945  |
| 119.H | -1.529540  | -10.160935 | 1.243051  |
| 120.H | -1.154229  | -11.215791 | -1.337847 |
| 121.O | -0.418512  | 9.181040   | -2.742467 |
| 122.H | -2.442669  | -9.138009  | -2.575826 |
| 123.H | -2.680438  | -7.626529  | -0.784898 |
| 124.H | 1.149387   | -7.359226  | -1.260132 |
| 125.H | -2.309535  | -1.938157  | -2.067453 |
| 126.H | -4.615479  | -2.449372  | -1.797435 |
| 127.H | -5.068309  | -4.118920  | -1.568756 |
| 128.O | 9.183652   | -0.419926  | -2.751059 |
| 129.H | 9.142359   | -2.443820  | -2.581786 |
| 130.O | -7.426319  | 8.060164   | 1.299836  |
| 131.H | 7.628622   | -2.681290  | -0.794073 |
| 132.H | 7.361729   | 1.149448   | -1.267998 |
| 133.H | 1.940126   | -2.308896  | -2.071777 |
| 134.H | 2.450966   | -4.614050  | -1.793023 |
| 135.H | 4.120733   | -5.066385  | -1.565172 |
| 136.H | 7.696016   | 2.769975   | 1.431431  |
| 137.H | 5.060066   | 5.641959   | 1.370803  |
| 138.H | -10.060809 | 3.491071   | -0.202415 |
| 139.H | 2.952149   | -0.498729  | 1.601626  |
| 140.C | 6.568221   | 0.446401   | -1.468965 |
| 141.N | 5.321596   | 0.769119   | -1.748809 |
| 142.C | 4.627363   | -0.436376  | -1.826560 |
| 143.C | 3.247179   | -0.691344  | -2.060590 |
| 144.O | 2.351634   | 0.139469   | -2.327449 |
| 145.N | 3.542911   | -4.348542  | -1.822102 |
| 146.N | 5.190795   | -2.823206  | -1.591767 |
| 147.C | 5.490860   | -1.512018  | -1.598334 |
| 148.H | 9.680618   | 0.924767   | 1.383272  |
| 149.H | 4.870248   | -1.945884  | 1.575205  |
| 150.H | -3.495798  | -10.057390 | -0.204671 |
| 151.H | 6.446849   | -1.173257  | 1.522799  |
| 152.P | 10.559134  | 2.759648   | -0.830675 |

|       |            |            |           |
|-------|------------|------------|-----------|
| 153.0 | 12.125375  | 2.541482   | -0.596423 |
| 154.0 | 10.132207  | 3.333057   | -2.140993 |
| 155.0 | 10.005035  | 1.265207   | -0.656224 |
| 156.C | 10.255728  | 0.472307   | 0.572374  |
| 157.N | 2.947347   | -2.070071  | -1.966090 |
| 158.H | -3.358823  | 12.643965  | -0.516606 |
| 159.C | 9.820281   | -0.967439  | 0.356414  |
| 160.0 | 8.364963   | -1.055568  | 0.304493  |
| 161.C | 10.344683  | -1.657922  | -0.928026 |
| 162.C | -3.776573  | 7.281520   | 1.328874  |
| 163.N | -4.047454  | 3.644893   | 1.496112  |
| 164.C | -2.670412  | 3.851733   | 1.546563  |
| 165.H | 2.680438   | 7.626529   | -0.784898 |
| 166.C | -1.586184  | 2.927653   | 1.614022  |
| 167.H | -6.941924  | 8.892831   | 3.165799  |
| 168.H | -7.136944  | 10.023867  | 1.805713  |
| 169.H | -4.798275  | 9.871257   | 2.482082  |
| 170.H | -5.378080  | 7.255053   | -0.123027 |
| 171.0 | -3.552104  | 7.558916   | -1.081745 |
| 172.H | -2.768020  | 7.700950   | 1.427141  |
| 173.H | -5.642214  | 5.066161   | 1.362945  |
| 174.0 | 8.064489   | 7.428869   | 1.296335  |
| 175.H | 1.529540   | 10.160935  | 1.243051  |
| 176.H | 2.309535   | 1.938157   | -2.067453 |
| 177.H | 0.496793   | 2.956101   | 1.601080  |
| 178.H | 1.944639   | 4.872077   | 1.581057  |
| 179.H | 1.174051   | 6.449618   | 1.533674  |
| 180.P | -2.754024  | 10.562642  | -0.825038 |
| 181.0 | -2.531443  | 12.128905  | -0.598326 |
| 182.0 | -3.323825  | 10.130785  | -2.135621 |
| 183.N | 3.581671   | 0.331710   | 1.596406  |
| 184.0 | -1.262127  | 10.004888  | -0.643710 |
| 185.C | -0.467459  | 10.258932  | 0.582930  |
| 186.C | 0.970289   | 9.818079   | 0.364332  |
| 187.0 | 1.051873   | 8.362637   | 0.310344  |
| 188.C | 1.659416   | 10.342134  | -0.921501 |
| 189.0 | 3.017282   | 10.762662  | -0.679163 |
| 190.C | 1.579925   | 9.146173   | -1.907883 |
| 191.0 | -3.568123  | 10.080124  | 0.466784  |
| 192.C | 9.049572   | 6.736929   | 2.097859  |
| 193.N | 2.823220   | 5.188598   | -1.586003 |
| 194.C | 9.053567   | 5.226911   | 1.883745  |
| 195.0 | 7.772612   | 4.665136   | 2.353179  |
| 196.C | -4.419550  | 7.773368   | 0.022603  |
| 197.C | 1.637654   | 7.926115   | -0.942769 |
| 198.N | 0.935523   | 6.737334   | -1.370421 |
| 199.C | -0.446592  | 6.565269   | -1.460135 |
| 200.C | 9.208453   | 4.768144   | 0.417941  |
| 201.H | -5.510501  | 9.688451   | -0.223519 |
| 202.0 | 10.070994  | 3.567212   | 0.463049  |
| 203.C | 7.765842   | 4.418329   | 0.022882  |
| 204.C | 7.275267   | 3.777803   | 1.330643  |
| 205.N | -0.769415  | 5.318247   | -1.737816 |
| 206.C | 4.952986   | 0.159647   | 1.616025  |
| 207.N | 5.447017   | -1.095056  | 1.688094  |
| 208.N | 5.815225   | 1.185205   | 1.591219  |
| 209.C | 5.214559   | 2.383083   | 1.532440  |
| 210.H | 8.893540   | 6.943211   | 3.163517  |
| 211.C | 0.436122   | 4.624175   | -1.816075 |
| 212.C | -5.227251  | 9.058624   | 1.884899  |
| 213.0 | -4.660281  | 7.779807   | 2.354313  |
| 214.N | 5.848489   | 3.618625   | 1.449891  |
| 215.C | -4.768447  | 9.216041   | 0.419429  |
| 216.H | 10.026786  | 7.132350   | 1.804308  |
| 217.0 | -8.064489  | -7.428869  | 1.296335  |
| 218.H | 9.864029   | 4.794085   | 2.481003  |
| 219.C | -9.049572  | -6.736929  | 2.097859  |
| 220.C | -9.053567  | -5.226911  | 1.883745  |
| 221.0 | -7.772612  | -4.665136  | 2.353179  |
| 222.H | 9.679473   | 5.509898   | -0.226283 |
| 223.C | -9.208453  | -4.768144  | 0.417941  |
| 224.H | 7.246470   | 5.376073   | -0.124629 |
| 225.H | 3.495798   | 10.057390  | -0.204671 |
| 226.0 | -10.070994 | -3.567212  | 0.463049  |
| 227.C | -4.627363  | 0.436376   | -1.826560 |
| 228.C | -3.247179  | 0.691344   | -2.060590 |
| 229.0 | -2.351634  | -0.139469  | -2.327449 |
| 230.N | -2.947347  | 2.070071   | -1.966090 |
| 231.C | -3.884894  | 3.071454   | -1.778795 |
| 232.N | -3.454291  | 4.348542   | -1.822102 |
| 233.N | -5.190795  | 2.823206   | -1.591767 |
| 234.C | -5.490860  | 1.512018   | -1.598334 |
| 235.H | -9.680618  | -0.924767  | 1.383272  |
| 236.H | -11.323706 | -0.507302  | 0.798607  |
| 237.H | -10.166525 | 1.522684   | 1.236554  |
| 238.H | -11.218710 | 1.153653   | -1.344645 |
| 239.0 | -9.183652  | 0.419926   | -2.751059 |
| 240.H | -9.142359  | 2.443820   | -2.581786 |
| 241.H | -7.628622  | 2.681290   | -0.794073 |
| 242.H | -7.361729  | -1.149448  | -1.267998 |
| 243.H | -1.940126  | 2.308896   | -2.071777 |
| 244.H | -2.450966  | 4.614050   | -1.793023 |
| 245.H | -4.120733  | 5.066385   | -1.565172 |
| 246.0 | 10.764007  | -3.015975  | -0.683426 |
| 247.C | 9.149188   | -1.580277  | -1.914940 |
| 248.C | 7.928698   | -1.638455  | -0.950039 |
| 249.C | 3.884894   | -3.071454  | -1.778795 |
| 250.H | 11.323706  | 0.507302   | 0.798607  |
| 251.H | 10.166525  | -1.522684  | 1.236554  |
| 252.H | 10.060809  | -3.491071  | -0.202415 |
| 253.C | 4.841032   | 4.585151   | 1.427223  |
| 254.H | 3.358823   | -12.643965 | -0.516606 |
| 255.N | 6.739992   | -0.935738  | -1.377554 |
| 256.H | -0.920704  | 9.688747   | 1.396859  |
| 257.H | 11.218710  | -1.153653  | -1.344645 |
| 258.H | -7.266994  | 7.190537   | 1.708415  |
| 259.H | 7.266994   | -7.190537  | 1.708415  |
| 260.H | 12.632581  | 3.369774   | -0.483659 |
| 261.N | -5.848489  | -3.618625  | 1.449891  |
| 262.C | -4.595574  | 4.847119   | 1.422705  |
| 263.H | -7.193536  | -7.271831  | 1.703231  |
| 264.H | -12.632581 | -3.369774  | -0.483659 |
| 265.H | -9.454443  | -0.345976  | -2.202063 |
| 266.H | 0.346276   | -9.452656  | -2.192410 |
| 267.H | 9.454443   | 0.345976   | -2.202063 |
| 268.H | -0.346276  | 9.452656   | -2.192410 |
| 269.H | 8.288909   | 3.659292   | -1.723362 |
| 270.H | -3.649282  | 8.304554   | -1.717699 |
| 271.H | -8.288909  | -3.659292  | -1.723362 |

|       |          |           |           |
|-------|----------|-----------|-----------|
| 272.H | 3.649282 | -8.304554 | -1.717699 |
|-------|----------|-----------|-----------|

| RNA GQ-Li <sup>+</sup> (Bond Energy: -39445.78) (Symmetry C2) |           |            |           |
|---------------------------------------------------------------|-----------|------------|-----------|
| 1.C                                                           | 6.468190  | -1.540348  | 1.516729  |
| 2.N                                                           | 5.358071  | -0.832786  | 1.599748  |
| 3.C                                                           | 4.323680  | -1.763701  | 1.679325  |
| 4.C                                                           | 2.909472  | -1.589277  | 1.727795  |
| 5.O                                                           | 2.266251  | -0.517514  | 1.745326  |
| 6.N                                                           | 2.227321  | -2.827604  | 1.746256  |
| 7.C                                                           | 2.838601  | -4.066870  | 1.771349  |
| 8.N                                                           | 2.059028  | -5.167229  | 1.836904  |
| 9.N                                                           | 4.168965  | -4.222952  | 1.746454  |
| 10.C                                                          | 4.839215  | -3.063433  | 1.671509  |
| 11.H                                                          | 10.660469 | -3.723944  | 3.266130  |
| 12.H                                                          | 11.452062 | -4.468337  | 1.856551  |
| 13.H                                                          | 9.408148  | -5.672300  | 2.451155  |
| 14.H                                                          | 9.928648  | -4.936639  | -0.211320 |
| 15.H                                                          | 8.445670  | -3.024411  | -0.020423 |
| 16.O                                                          | 7.106560  | -4.258069  | -1.037111 |
| 17.H                                                          | 6.526361  | -4.922600  | 1.440671  |
| 18.H                                                          | 7.468829  | -1.140005  | 1.435089  |
| 19.H                                                          | 1.187848  | -2.756443  | 1.736514  |
| 20.H                                                          | 1.030671  | -5.148332  | 1.719748  |
| 21.H                                                          | 2.538284  | -6.047887  | 1.679561  |
| 22.P                                                          | 8.206470  | -7.174396  | -0.997847 |
| 23.O                                                          | 8.950083  | -8.582754  | -0.866583 |
| 24.O                                                          | 8.438460  | -6.386366  | -2.244595 |
| 25.O                                                          | 6.671899  | -7.617978  | -0.882017 |
| 26.C                                                          | 6.160252  | -8.416639  | 0.258220  |
| 27.C                                                          | -2.994969 | -1.064518  | -1.529078 |
| 28.C                                                          | 4.708440  | -8.782113  | 0.005181  |
| 29.O                                                          | 3.872117  | -7.590327  | 0.105856  |
| 30.C                                                          | 4.397135  | -9.427170  | -1.371911 |
| 31.O                                                          | 3.506122  | -10.554639 | -1.259071 |
| 32.C                                                          | 3.782239  | -8.266783  | -2.198401 |
| 33.C                                                          | 3.075082  | -7.434617  | -1.092206 |
| 34.C                                                          | -4.323680 | 1.763701   | 1.679325  |
| 35.N                                                          | 2.938192  | -6.017038  | -1.346335 |
| 36.C                                                          | -2.909472 | 1.589277   | 1.727795  |
| 37.H                                                          | -4.632134 | 2.519569   | -1.573205 |
| 38.N                                                          | -3.576011 | 0.210912   | -1.536566 |
| 39.N                                                          | -5.163477 | -2.055435  | 1.840601  |
| 40.H                                                          | -6.305622 | 1.963227   | -1.569763 |
| 41.C                                                          | -4.939833 | 0.466065   | -1.561793 |
| 42.O                                                          | -7.522719 | -4.753722  | -2.948928 |
| 43.O                                                          | -1.738739 | -1.194810  | -1.524911 |
| 44.H                                                          | -8.637391 | -3.051648  | -2.923974 |
| 45.C                                                          | 7.944479  | -3.997686  | 0.080309  |
| 46.N                                                          | -2.908971 | -6.215069  | 1.569514  |
| 47.H                                                          | -5.317552 | -4.995396  | -1.192779 |
| 48.H                                                          | -9.326270 | -6.777321  | 0.324252  |
| 49.H                                                          | -9.809276 | -5.297584  | -1.882511 |
| 50.O                                                          | -7.106560 | 4.258069   | -1.037111 |
| 51.C                                                          | 3.953839  | -5.064142  | -1.336696 |
| 52.N                                                          | 3.479675  | -3.840113  | -1.443156 |
| 53.O                                                          | -0.513965 | -2.262110  | 1.740241  |
| 54.C                                                          | -4.063159 | -2.835160  | 1.775406  |
| 55.C                                                          | -3.913219 | -10.576079 | 2.202097  |
| 56.N                                                          | -2.824143 | -2.223648  | 1.747880  |
| 57.C                                                          | 7.135918  | -4.012461  | 1.388014  |
| 58.C                                                          | -5.328357 | -1.738448  | -1.457209 |
| 59.O                                                          | -2.266251 | 0.517514   | 1.745326  |
| 60.H                                                          | -9.985035 | 2.038935   | 1.910137  |
| 61.N                                                          | -5.358071 | 0.832786   | 1.599748  |
| 62.N                                                          | -4.219095 | -4.165643  | 1.754034  |
| 63.C                                                          | -3.059416 | -4.835931  | 1.680754  |
| 64.N                                                          | -5.321836 | 1.746935   | -1.669660 |
| 65.O                                                          | 2.656972  | 10.616098  | 1.486419  |
| 66.C                                                          | 3.913219  | 10.576079  | 2.202097  |
| 67.C                                                          | 4.727363  | 9.318612   | 1.917725  |
| 68.O                                                          | 3.992584  | 8.143712   | 2.423310  |
| 69.C                                                          | 5.007639  | 9.040513   | 0.424993  |
| 70.O                                                          | 6.395691  | 8.537354   | 0.357810  |
| 71.C                                                          | 3.986393  | 7.942926   | 0.088434  |
| 72.C                                                          | 4.007436  | 7.132763   | 1.395051  |
| 73.N                                                          | 2.908971  | 6.215069   | 1.569514  |
| 74.C                                                          | 1.536027  | 6.464538   | 1.525729  |
| 75.N                                                          | 0.828761  | 5.354048   | 1.606150  |
| 76.C                                                          | 1.759885  | 4.319910   | 1.686023  |
| 77.C                                                          | 1.585793  | 2.905466   | 1.728724  |
| 78.O                                                          | 0.513965  | 2.262110   | 1.740241  |
| 79.N                                                          | 2.824143  | 2.223648   | 1.747880  |
| 80.C                                                          | 4.063159  | 2.835160   | 1.775406  |
| 81.N                                                          | 5.163477  | 2.055435   | 1.840601  |
| 82.N                                                          | 4.219095  | 4.165643   | 1.754034  |
| 83.C                                                          | 3.059416  | 4.835931   | 1.680754  |
| 84.H                                                          | 3.743892  | 10.653101  | 3.282848  |
| 85.H                                                          | 4.489303  | 11.446826  | 1.874700  |
| 86.H                                                          | 5.681191  | 9.391298   | 2.452171  |
| 87.H                                                          | 4.927781  | 9.925935   | -0.205075 |
| 88.H                                                          | 3.013582  | 8.446645   | -0.004468 |
| 89.O                                                          | 4.236375  | 7.106068   | -1.031970 |
| 90.H                                                          | 4.917919  | 6.523309   | 1.443596  |
| 91.H                                                          | 1.135431  | 7.465184   | 1.445354  |
| 92.H                                                          | 2.753647  | 1.184057   | 1.738763  |
| 93.H                                                          | 5.145805  | 1.027571   | 1.720091  |
| 94.H                                                          | 6.044740  | 2.535249   | 1.689052  |
| 95.P                                                          | 7.158790  | 8.206066   | -1.011855 |
| 96.O                                                          | 8.561364  | 8.952874   | -0.895026 |
| 97.O                                                          | 6.358577  | 8.429052   | -2.252471 |
| 98.O                                                          | 7.615785  | 6.675856   | -0.896372 |
| 99.C                                                          | 8.422047  | 6.170702   | 0.241203  |
| 100.C                                                         | 8.790051  | 4.718874   | -0.007739 |
| 101.O                                                         | 7.600405  | 3.880309   | 0.103043  |
| 102.C                                                         | 9.428246  | 4.402672   | -1.386971 |
| 103.O                                                         | 10.557814 | 3.513788   | -1.276949 |
| 104.C                                                         | 8.264373  | 3.782471   | -2.204485 |
| 105.C                                                         | 7.439103  | 3.078381   | -1.090922 |
| 106.N                                                         | 6.020203  | 2.939215   | -1.338373 |
| 107.C                                                         | 5.066690  | 3.954241   | -1.326637 |
| 108.N                                                         | 3.842997  | 3.479538   | -1.433707 |
| 109.C                                                         | 3.972230  | 2.094763   | -1.510757 |
| 110.C                                                         | 2.994969  | 1.064518   | -1.529078 |
| 111.O                                                         | 1.738739  | 1.194810   | -1.524911 |
| 112.N                                                         | 3.576011  | -0.210912  | -1.536566 |



|       |            |            |           |
|-------|------------|------------|-----------|
| 113.C | 4.939833   | -0.466065  | -1.561793 |
| 114.N | 5.321836   | -1.746935  | -1.669660 |
| 115.N | 5.860047   | 0.507896   | -1.503074 |
| 116.C | 5.328357   | 1.738448   | -1.457209 |
| 117.H | 7.818776   | 6.261853   | 1.147283  |
| 118.H | 9.326270   | 6.777321   | 0.324252  |
| 119.H | 9.489931   | 4.437742   | 0.788781  |
| 120.H | 9.809276   | 5.297584   | -1.882511 |
| 121.O | 7.522719   | 4.753722   | -2.948928 |
| 122.H | 8.637391   | 3.051648   | -2.923974 |
| 123.H | 7.824693   | 2.064618   | -0.927270 |
| 124.H | 5.317552   | 4.995396   | -1.192779 |
| 125.H | 2.885189   | -0.984365  | -1.536501 |
| 126.H | 4.632134   | -2.519569  | -1.573205 |
| 127.H | 6.305622   | -1.963227  | -1.569763 |
| 128.O | -4.757625  | 7.530705   | -2.943516 |
| 129.H | -3.053568  | 8.642804   | -2.918606 |
| 130.O | -2.656972  | -10.616098 | 1.486419  |
| 131.H | -2.060046  | 7.818200   | -0.930877 |
| 132.H | -4.995115  | 5.315496   | -1.204421 |
| 133.H | 0.984669   | 2.881189   | -1.531414 |
| 134.H | 2.520466   | 4.627472   | -1.563848 |
| 135.H | 1.965949   | 6.300669   | -1.564046 |
| 136.H | -6.526361  | 4.922600   | 1.440671  |
| 137.H | -7.468829  | 1.140005   | 1.435089  |
| 138.H | 2.729346   | -10.304028 | -0.724803 |
| 139.H | -1.187848  | 2.756443   | 1.736514  |
| 140.C | -3.953839  | 5.064142   | -1.336696 |
| 141.N | -3.479675  | 3.840113   | -1.443156 |
| 142.C | -2.094421  | 3.968672   | -1.516645 |
| 143.C | -1.064224  | 2.991457   | -1.531162 |
| 144.O | -1.195150  | 1.735101   | -1.527511 |
| 145.N | 1.748081   | 5.317096   | -1.662757 |
| 146.N | -0.507097  | 5.856244   | -1.503983 |
| 147.C | -1.737645  | 5.324597   | -1.462120 |
| 148.H | -6.249502  | 7.808282   | 1.161035  |
| 149.H | -1.030671  | 5.148332   | 1.719748  |
| 150.H | 10.314140  | 2.742683   | -0.731359 |
| 151.H | -2.538284  | 6.047887   | 1.679561  |
| 152.P | -8.206470  | 7.174396   | -0.997847 |
| 153.O | -8.950083  | 8.582754   | -0.866583 |
| 154.O | -8.438460  | 6.386366   | -2.244595 |
| 155.O | -6.671899  | 7.617978   | -0.882017 |
| 156.C | -6.160252  | 8.416639   | 0.258220  |
| 157.N | 0.211190   | 3.571989   | -1.533810 |
| 158.H | -8.486312  | -9.932293  | -0.788546 |
| 159.C | -4.708440  | 8.762113   | 0.005181  |
| 160.O | -3.872117  | 7.590327   | 0.105856  |
| 161.C | -4.397135  | 9.427170   | -1.371911 |
| 162.C | -4.007436  | -7.132763  | 1.395051  |
| 163.N | -0.828761  | -5.354048  | 1.606150  |
| 164.C | -1.759885  | -4.319910  | 1.686023  |
| 165.H | -7.824693  | -2.064618  | -0.927270 |
| 166.C | -1.585793  | -2.905466  | 1.728724  |
| 167.H | -3.743892  | -10.653101 | 3.282848  |
| 168.H | -4.489303  | -11.446826 | 1.874700  |
| 169.H | -5.681191  | -9.391298  | 2.452171  |
| 170.H | -3.013582  | -8.446645  | -0.004468 |
| 171.O | -4.236375  | -7.106068  | -1.031970 |
| 172.H | -4.917919  | -6.523309  | 1.443596  |
| 173.H | -1.135431  | -7.465184  | 1.445354  |
| 174.O | -10.606324 | 2.643497   | 1.466070  |
| 175.H | -9.489931  | -4.437742  | 0.788781  |
| 176.H | -2.885189  | 0.984365   | -1.536501 |
| 177.H | -2.753647  | -1.184057  | 1.738763  |
| 178.H | -5.145805  | -1.027571  | 1.720091  |
| 179.H | -6.044740  | -2.535249  | 1.689052  |
| 180.P | -7.158790  | -8.206066  | -1.011855 |
| 181.O | -8.561364  | -8.962874  | -0.895026 |
| 182.O | -6.358577  | -8.429952  | -2.252471 |
| 183.N | -2.227321  | 2.827604   | 1.746256  |
| 184.O | -7.615785  | -6.675856  | -0.896372 |
| 185.C | -8.422047  | -6.170702  | 0.241203  |
| 186.C | -8.790051  | -4.718874  | -0.007739 |
| 187.O | -7.600405  | -3.880309  | 0.103043  |
| 188.C | -9.428246  | -4.402672  | -1.386971 |
| 189.O | -10.557814 | -3.513788  | -1.276949 |
| 190.C | -8.264373  | -3.702471  | -2.204485 |
| 191.O | -6.395691  | -8.537354  | 0.357810  |
| 192.C | -10.578962 | 3.897493   | 2.186398  |
| 193.N | -5.860047  | -0.507896  | -1.503074 |
| 194.C | -9.326104  | 4.722215   | 1.911270  |
| 195.O | -8.147192  | 3.993156   | 2.416105  |
| 196.C | -3.986393  | -7.942926  | 0.088434  |
| 197.C | -7.439103  | -3.078381  | -1.090922 |
| 198.N | -6.020203  | -2.939215  | -1.338373 |
| 199.C | -5.066690  | -3.954241  | -1.326637 |
| 200.C | -9.045169  | 5.013986   | 0.421708  |
| 201.H | -4.927781  | -9.925935  | -0.205075 |
| 202.O | -8.545494  | 6.404154   | 0.366072  |
| 203.C | -7.944479  | 3.997686   | 0.080309  |
| 204.C | -7.135918  | 4.012461   | 1.388014  |
| 205.N | -3.842997  | -3.479538  | -1.433707 |
| 206.C | -2.838601  | 4.066870   | 1.771349  |
| 207.N | -2.059028  | 5.167229   | 1.836904  |
| 208.N | -4.168965  | 4.222952   | 1.746454  |
| 209.C | -4.839215  | 3.063433   | 1.671509  |
| 210.H | -10.660469 | 3.723944   | 3.266130  |
| 211.C | -3.972230  | -2.094763  | -1.510757 |
| 212.C | -4.727363  | -9.318612  | 1.917725  |
| 213.O | -3.992584  | -8.143712  | 2.423310  |
| 214.N | -6.218242  | 2.913311   | 1.558808  |
| 215.C | -5.007639  | -9.040513  | 0.424993  |
| 216.H | -11.452062 | 4.468337   | 1.856551  |
| 217.O | 10.606324  | -2.643497  | 1.466070  |
| 218.H | -9.408148  | 5.672300   | 2.451155  |
| 219.C | 10.578862  | -3.897493  | 2.186398  |
| 220.C | 9.326104   | -4.722215  | 1.911270  |
| 221.O | 8.147192   | -3.993156  | 2.416105  |
| 222.H | -9.928548  | 4.036639   | -0.211320 |
| 223.C | 9.045169   | -5.013986  | 0.421708  |
| 224.H | -8.445670  | 3.024411   | -0.020423 |
| 225.H | -10.314140 | -2.742683  | -0.731359 |
| 226.O | 8.545494   | -6.404154  | 0.366072  |
| 227.C | 2.094421   | -3.968672  | -1.516645 |
| 228.C | 1.064224   | -2.991457  | -1.531162 |
| 229.O | 1.195150   | -1.735101  | -1.527511 |
| 230.N | -0.211190  | -3.571989  | -1.533810 |
| 231.C | -0.466819  | -4.935777  | -1.559146 |

|        |           |           |           |
|--------|-----------|-----------|-----------|
| 232.N  | -1.748081 | -5.317096 | -1.662757 |
| 233.N  | 0.507097  | -5.856244 | -1.503983 |
| 234.C  | 1.737645  | -5.324597 | -1.462120 |
| 235.H  | 6.249502  | -7.808282 | 1.161035  |
| 236.H  | 6.763687  | -9.322464 | 0.349098  |
| 237.H  | 4.422193  | -9.477493 | 0.803527  |
| 238.H  | 5.293510  | -9.812785 | -1.861216 |
| 239.O  | 4.757625  | -7.530705 | -2.943516 |
| 240.H  | 3.053568  | -8.642804 | -2.918606 |
| 241.H  | 2.060046  | -7.818200 | -0.930877 |
| 242.H  | 4.995115  | -5.315496 | -1.204421 |
| 243.H  | -0.984669 | -2.881189 | -1.531414 |
| 244.H  | -2.520466 | -4.627472 | -1.563848 |
| 245.H  | -1.965949 | -6.300669 | -1.564046 |
| 246.O  | -3.506122 | 10.554639 | -1.259071 |
| 247.C  | -3.782239 | 8.266783  | -2.198401 |
| 248.C  | -3.075082 | 7.434617  | -1.092206 |
| 249.C  | 0.466819  | 4.935777  | -1.559146 |
| 250.H  | -6.763687 | 9.322464  | 0.349098  |
| 251.H  | -4.422193 | 9.477493  | 0.803527  |
| 252.H  | -2.729346 | 10.304028 | -0.724803 |
| 253.C  | -6.468190 | 1.540348  | 1.516729  |
| 254.H  | 8.486312  | 9.932293  | -0.788546 |
| 255.N  | -2.938192 | 6.017038  | -1.346335 |
| 256.H  | -7.818776 | -6.261853 | 1.147283  |
| 257.H  | -5.293510 | 9.812785  | -1.861216 |
| 258.H  | -2.051786 | -9.991910 | 1.925730  |
| 259.H  | 2.051786  | 9.991910  | 1.925730  |
| 260.H  | -9.915566 | 8.516848  | -0.727171 |
| 261.N  | 6.218242  | -2.913311 | 1.558808  |
| 262.C  | -1.536027 | -6.464538 | 1.525729  |
| 263.H  | 9.985035  | -2.038935 | 1.910137  |
| 264.H  | 9.915566  | -8.516848 | -0.727171 |
| 265.H  | 5.555587  | -7.424255 | -2.383382 |
| 266.H  | 7.419104  | 5.554169  | -2.391951 |
| 267.H  | -5.555587 | 7.424255  | -2.383382 |
| 268.H  | -7.419104 | -5.554169 | -2.391951 |
| 269.H  | -7.618794 | 4.761855  | -1.711368 |
| 270.H  | -4.738610 | -7.617483 | -1.708084 |
| 271.H  | 7.618794  | -4.761855 | -1.711368 |
| 272.H  | 4.738610  | 7.617483  | -1.708084 |
| 273.Li | 0.000000  | 0.000000  | -1.283936 |

| RNA GQ-Na <sup>+</sup> (Bond Energy: -39436.46) (Symmetry C2) |           |            |           |
|---------------------------------------------------------------|-----------|------------|-----------|
| 1.C                                                           | 6.411738  | -1.501935  | 1.472657  |
| 2.N                                                           | 5.290931  | -0.808173  | 1.495800  |
| 3.C                                                           | 4.264853  | -1.748217  | 1.579240  |
| 4.C                                                           | 2.849378  | -1.600381  | 1.539141  |
| 5.O                                                           | 2.187238  | -0.537401  | 1.445160  |
| 6.N                                                           | 2.186598  | -2.842795  | 1.596870  |
| 7.C                                                           | 2.813848  | -4.072830  | 1.690539  |
| 8.N                                                           | 2.048125  | -5.178777  | 1.759850  |
| 9.N                                                           | 4.146157  | -4.206621  | 1.720761  |
| 10.C                                                          | 4.800021  | -3.040820  | 1.634726  |
| 11.H                                                          | 10.628294 | -3.645073  | 3.288790  |
| 12.H                                                          | 11.423709 | -4.421511  | 1.898753  |
| 13.H                                                          | 9.372868  | -5.605815  | 2.503692  |
| 14.H                                                          | 9.902864  | -4.913653  | -0.170945 |
| 15.H                                                          | 8.420226  | -2.994932  | -0.004169 |
| 16.O                                                          | 7.085903  | -4.238577  | -1.013806 |
| 17.H                                                          | 6.507245  | -4.883002  | 1.478530  |
| 18.H                                                          | 7.408940  | -1.089654  | 1.409693  |
| 19.H                                                          | 1.148790  | -2.781806  | 1.545247  |
| 20.H                                                          | 1.020841  | -5.164097  | 1.620784  |
| 21.H                                                          | 2.540596  | -6.059425  | 1.649176  |
| 22.P                                                          | 8.172975  | -7.158557  | -0.925836 |
| 23.O                                                          | 8.913193  | -8.567010  | -0.775765 |
| 24.O                                                          | 8.406353  | -6.380992  | -2.184045 |
| 25.O                                                          | 6.636775  | -7.596827  | -0.803688 |
| 26.C                                                          | 6.124542  | -8.373494  | 0.351993  |
| 27.C                                                          | -3.036993 | -1.124254  | -1.591357 |
| 28.C                                                          | 4.687776  | -8.790879  | 0.091281  |
| 29.O                                                          | 3.808894  | -7.626762  | 0.142386  |
| 30.C                                                          | 4.411037  | -9.491442  | -1.264069 |
| 31.O                                                          | 3.529186  | -10.623310 | -1.122321 |
| 32.C                                                          | 3.797059  | -8.373291  | -2.147454 |
| 33.C                                                          | 3.059658  | -7.501238  | -1.091276 |
| 34.C                                                          | -4.264853 | 1.748217   | 1.579240  |
| 35.N                                                          | 2.945466  | -6.090746  | -1.394301 |
| 36.C                                                          | -2.849378 | 1.600381   | 1.539141  |
| 37.H                                                          | -4.624499 | 2.507086   | -1.635801 |
| 38.N                                                          | -3.593423 | 0.165471   | -1.612143 |
| 39.N                                                          | -5.178336 | -2.048502  | 1.762990  |
| 40.H                                                          | -6.290959 | 1.963851   | -1.633127 |
| 41.C                                                          | -4.950440 | 0.444618   | -1.639315 |
| 42.O                                                          | -7.660440 | -4.778886  | -2.912124 |
| 43.O                                                          | -1.788503 | -1.277111  | -1.545839 |
| 44.H                                                          | -8.787900 | -3.087809  | -2.863584 |
| 45.C                                                          | 7.919074  | -3.967579  | 0.103765  |
| 46.N                                                          | -2.872994 | -6.178112  | 1.554000  |
| 47.H                                                          | -5.414042 | -5.009766  | -1.221689 |
| 48.H                                                          | -9.257992 | -6.746289  | 0.489730  |
| 49.H                                                          | -9.885835 | -5.320922  | -1.718364 |
| 50.O                                                          | -7.085903 | 4.238577   | -1.013806 |
| 51.C                                                          | 3.974919  | -5.149914  | -1.373971 |
| 52.N                                                          | 3.520936  | -3.920080  | -1.498362 |
| 53.O                                                          | -0.536641 | -2.185583  | 1.446339  |
| 54.C                                                          | -4.071839 | -2.813616  | 1.692676  |
| 55.C                                                          | -3.847384 | -10.549629 | 2.222906  |
| 56.N                                                          | -2.842120 | -2.185675  | 1.599272  |
| 57.C                                                          | 7.108578  | -3.986523  | 1.410567  |
| 58.C                                                          | -5.380659 | -1.755924  | -1.535554 |
| 59.O                                                          | -2.187238 | 0.537401   | 1.445160  |
| 60.H                                                          | -9.964606 | 1.986186   | 1.892260  |
| 61.N                                                          | -5.290931 | 0.808173   | 1.495800  |
| 62.N                                                          | -4.205115 | -4.145978  | 1.721436  |
| 63.C                                                          | -3.039052 | -4.799284  | 1.634007  |
| 64.N                                                          | -5.311079 | 1.734826   | -1.746202 |
| 65.O                                                          | 2.605733  | 10.591180  | 1.482472  |
| 66.C                                                          | 3.847384  | 10.549629  | 2.222906  |
| 67.C                                                          | 4.666318  | 9.292146   | 1.953049  |
| 68.O                                                          | 3.918230  | 8.116345   | 2.438432  |
| 69.C                                                          | 4.980545  | 9.017394   | 0.466256  |
| 70.O                                                          | 6.369942  | 8.512529   | 0.430429  |
| 71.C                                                          | 3.967401  | 7.920622   | 0.104726  |

|       |            |            |           |
|-------|------------|------------|-----------|
| 72.C  | 3.965998   | 7.107709   | 1.409910  |
| 73.N  | 2.872994   | 6.178112   | 1.554000  |
| 74.C  | 1.499754   | 6.410065   | 1.466257  |
| 75.N  | 0.806507   | 5.289045   | 1.491379  |
| 76.C  | 1.746778   | 4.263543   | 1.578389  |
| 77.C  | 1.599383   | 2.848024   | 1.540229  |
| 78.O  | 0.536641   | 2.185583   | 1.446339  |
| 79.N  | 2.842120   | 2.185675   | 1.599272  |
| 80.C  | 4.071839   | 2.813616   | 1.692676  |
| 81.N  | 5.178336   | 2.048502   | 1.762990  |
| 82.N  | 4.205115   | 4.145978   | 1.721436  |
| 83.C  | 3.039052   | 4.799284   | 1.634007  |
| 84.H  | 3.656819   | 10.625441  | 3.300257  |
| 85.H  | 4.430450   | 11.420342  | 1.908125  |
| 86.H  | 5.608005   | 9.361644   | 2.508817  |
| 87.H  | 4.916773   | 9.904315   | -0.163662 |
| 88.H  | 2.995645   | 8.423503   | -0.003868 |
| 89.O  | 4.238958   | 7.088449   | -1.013386 |
| 90.H  | 4.880488   | 6.506391   | 1.478207  |
| 91.H  | 1.087012   | 7.406812   | 1.399331  |
| 92.H  | 2.781689   | 1.147745   | 1.548751  |
| 93.H  | 5.164447   | 1.021331   | 1.623578  |
| 94.H  | 6.058372   | 2.541621   | 1.650207  |
| 95.P  | 7.160439   | 8.171245   | -0.920831 |
| 96.O  | 8.567931   | 8.912807   | -0.768191 |
| 97.O  | 6.393798   | 8.405456   | -2.180517 |
| 98.O  | 7.598337   | 6.634757   | -0.799431 |
| 99.C  | 8.373360   | 6.120044   | 0.356425  |
| 100.C | 8.790641   | 4.683594   | 0.092550  |
| 101.O | 7.627383   | 3.803752   | 0.141906  |
| 102.C | 9.490559   | 4.410552   | -1.263844 |
| 103.O | 10.621942  | 3.527213   | -1.124980 |
| 104.C | 8.371965   | 3.799720   | -2.148965 |
| 105.C | 7.499978   | 3.059229   | -1.094896 |
| 106.N | 6.089213   | 2.945877   | -1.396119 |
| 107.C | 5.148246   | 3.975223   | -1.374811 |
| 108.N | 3.918256   | 3.521026   | -1.496653 |
| 109.C | 4.032725   | 2.135564   | -1.593874 |
| 110.C | 3.036993   | 1.124254   | -1.591357 |
| 111.O | 1.788503   | 1.277111   | -1.545839 |
| 112.N | 3.593423   | -0.165471  | -1.612143 |
| 113.C | 4.950440   | -0.444618  | -1.639315 |
| 114.N | 5.311079   | -1.734826  | -1.746202 |
| 115.N | 5.889057   | 0.513147   | -1.580468 |
| 116.C | 5.380659   | 1.755924   | -1.535554 |
| 117.H | 7.732261   | 6.174520   | 1.239146  |
| 118.H | 9.257992   | 6.746289   | 0.489730  |
| 119.H | 9.466753   | 4.408799   | 0.911353  |
| 120.H | 9.885635   | 5.320922   | -1.718364 |
| 121.O | 7.660440   | 4.778886   | -2.912124 |
| 122.H | 8.787900   | 3.087809   | -2.863584 |
| 123.H | 7.868573   | 2.035243   | -0.960224 |
| 124.H | 5.414042   | 5.009766   | -1.221689 |
| 125.H | 2.893324   | -0.933036  | -1.599514 |
| 126.H | 4.624499   | -2.507086  | -1.635801 |
| 127.H | 6.290959   | -1.963851  | -1.633127 |
| 128.O | -4.774501  | 7.661274   | -2.912448 |
| 129.H | -3.083440  | 8.789118   | -2.860618 |
| 130.O | -2.605733  | -10.591180 | 1.482472  |
| 131.H | -2.036280  | 7.869965   | -0.952346 |
| 132.H | -5.009237  | 5.415536   | -1.219141 |
| 133.H | 0.932431   | 2.894430   | -1.601542 |
| 134.H | 2.507058   | 4.625800   | -1.635963 |
| 135.H | 1.963939   | 6.292643   | -1.633822 |
| 136.H | -6.507245  | 4.883002   | 1.478530  |
| 137.H | -7.408940  | 1.089654   | 1.409693  |
| 138.H | 2.742807   | -10.360525 | -0.608397 |
| 139.H | -1.148790  | 2.781806   | 1.545247  |
| 140.C | -3.974919  | 5.149914   | -1.373971 |
| 141.N | -3.520936  | 3.920080   | -1.498362 |
| 142.C | -2.135598  | 4.034785   | -1.597030 |
| 143.C | -1.124587  | 3.038880   | -1.595904 |
| 144.O | -1.278060  | 1.790492   | -1.551790 |
| 145.N | 1.735066   | 5.312669   | -1.746603 |
| 146.N | -0.512767  | 5.890679   | -1.581237 |
| 147.C | -1.755698  | 5.382518   | -1.536462 |
| 148.H | -6.181007  | 7.733636   | 1.235515  |
| 149.H | -1.020841  | 5.164097   | 1.620784  |
| 150.H | 10.356661  | 2.735316   | -0.620797 |
| 151.H | -2.540596  | 6.059425   | 1.649176  |
| 152.P | -8.172975  | 7.158557   | -0.925836 |
| 153.O | -8.913193  | 8.567010   | -0.775765 |
| 154.O | -8.406353  | 6.388992   | -2.184045 |
| 155.O | -6.636775  | 7.596827   | -0.803688 |
| 156.C | -6.124542  | 8.373494   | 0.351993  |
| 157.N | 0.165363   | 3.594927   | -1.615930 |
| 158.H | -8.499694  | -9.879667  | -0.637192 |
| 159.C | -4.687776  | 8.790879   | 0.091281  |
| 160.O | -3.808894  | 7.626762   | 0.142386  |
| 161.C | -4.411037  | 9.491442   | -1.264069 |
| 162.C | -3.965998  | -7.107709  | 1.409910  |
| 163.N | -0.806507  | -5.289045  | 1.491379  |
| 164.C | -1.746778  | -4.263543  | 1.578389  |
| 165.H | -7.868573  | -2.035243  | -0.960224 |
| 166.C | -1.599383  | -2.848024  | 1.540229  |
| 167.H | -3.656819  | -10.625441 | 3.300257  |
| 168.H | -4.430450  | -11.420342 | 1.908125  |
| 169.H | -5.608005  | -9.361644  | 2.508817  |
| 170.H | -2.995645  | -8.423503  | -0.003868 |
| 171.O | -4.238958  | -7.088449  | -1.013386 |
| 172.H | -4.880488  | -6.506391  | 1.478207  |
| 173.H | -1.087012  | -7.406812  | 1.399331  |
| 174.O | -10.588725 | 2.601257   | 1.466928  |
| 175.H | -9.466753  | -4.408799  | 0.911353  |
| 176.H | -2.893324  | 0.933036   | -1.599514 |
| 177.H | -2.781689  | -1.147745  | 1.548751  |
| 178.H | -5.164447  | -1.021331  | 1.623578  |
| 179.H | -6.058372  | -2.541621  | 1.650207  |
| 180.P | -7.160439  | -8.171245  | -0.920831 |
| 181.O | -8.567931  | -8.912807  | -0.768191 |
| 182.O | -6.393798  | -8.405456  | -2.180517 |
| 183.N | -2.186598  | 2.842795   | 1.596870  |
| 184.O | -7.598337  | -6.634757  | -0.799431 |
| 185.C | -8.373360  | -6.120044  | 0.356425  |
| 186.C | -8.790641  | -4.683594  | 0.092550  |
| 187.O | -7.627383  | -3.803752  | 0.141906  |
| 188.C | -9.490559  | -4.410552  | -1.263844 |
| 189.O | -10.621942 | -3.527213  | -1.124980 |
| 190.C | -8.371965  | -3.799720  | -2.148965 |

|        |            |           |           |
|--------|------------|-----------|-----------|
| 191.O  | -6.369942  | -8.512529 | 0.430429  |
| 192.C  | -10.551529 | 3.840060  | 2.212335  |
| 193.N  | -5.889057  | -0.513147 | -1.580468 |
| 194.C  | -9.296598  | 4.664680  | 1.947467  |
| 195.O  | -8.118900  | 3.922111  | 2.437372  |
| 196.C  | -3.967401  | -7.920622 | 0.104726  |
| 197.C  | -7.499978  | -3.059229 | -1.094896 |
| 198.N  | -6.089213  | -2.945877 | -1.396119 |
| 199.C  | -5.148246  | -3.975223 | -1.374811 |
| 200.C  | -9.018205  | 4.979331  | 0.461713  |
| 201.H  | -4.916773  | -9.904315 | -0.163662 |
| 202.O  | -8.515307  | 6.369828  | 0.426421  |
| 203.C  | -7.919074  | 3.967579  | 0.103765  |
| 204.C  | -7.108578  | 3.968523  | 1.410567  |
| 205.N  | -3.918256  | -3.521026 | -1.496653 |
| 206.C  | -2.813848  | 4.072030  | 1.690539  |
| 207.N  | -2.048125  | 5.178777  | 1.759050  |
| 208.N  | -4.146157  | 4.706621  | 1.720761  |
| 209.C  | -4.800021  | 3.040820  | 1.634726  |
| 210.H  | -10.628294 | 3.645073  | 3.288790  |
| 211.C  | -4.032725  | -2.135564 | -1.593874 |
| 212.C  | -4.666318  | -9.292146 | 1.953049  |
| 213.O  | -3.918230  | -8.116345 | 2.438432  |
| 214.N  | -6.179174  | 2.875315  | 1.557938  |
| 215.C  | -4.980545  | -9.017394 | 0.466256  |
| 216.H  | -11.423709 | 4.421511  | 1.898753  |
| 217.O  | 10.588725  | -2.601257 | 1.466928  |
| 218.H  | -9.372868  | 5.605815  | 2.503692  |
| 219.C  | 10.551529  | -3.840060 | 2.212335  |
| 220.C  | 9.296598   | -4.664680 | 1.947467  |
| 221.O  | 8.118900   | -3.922111 | 2.437372  |
| 222.H  | -9.902864  | 4.913653  | -0.170945 |
| 223.C  | 9.018205   | -4.979331 | 0.461713  |
| 224.H  | -8.420226  | 2.994932  | -0.004169 |
| 225.H  | -10.356661 | -2.735316 | -0.620797 |
| 226.O  | 8.515307   | -6.369828 | 0.426421  |
| 227.C  | 2.135598   | -4.034785 | -1.597030 |
| 228.C  | 1.124587   | -3.038880 | -1.595904 |
| 229.O  | 1.278060   | -1.790492 | -1.551790 |
| 230.N  | -0.165363  | -3.594927 | -1.615930 |
| 231.C  | -0.444725  | -4.952009 | -1.641069 |
| 232.N  | -1.735066  | -5.312669 | -1.746603 |
| 233.N  | 0.512767   | -5.890679 | -1.581237 |
| 234.C  | 1.755698   | -5.382518 | -1.536462 |
| 235.H  | 6.181007   | -7.733636 | 1.235515  |
| 236.H  | 6.751362   | -9.258178 | 0.483234  |
| 237.H  | 4.414462   | -9.466309 | 0.910956  |
| 238.H  | 5.320188   | -9.885758 | -1.721965 |
| 239.O  | 4.774501   | -7.661274 | -2.912448 |
| 240.H  | 3.083440   | -8.789118 | -2.860618 |
| 241.H  | 2.036280   | -7.869965 | -0.952346 |
| 242.H  | 5.009237   | -5.415536 | -1.219141 |
| 243.H  | -0.932431  | -2.894430 | -1.601542 |
| 244.H  | -2.507058  | -4.625800 | -1.635963 |
| 245.H  | -1.963939  | -6.292643 | -1.633822 |
| 246.O  | -3.529186  | 10.623310 | -1.122321 |
| 247.C  | -3.797059  | 8.373291  | -2.147454 |
| 248.C  | -3.059658  | 7.501238  | -1.091276 |
| 249.C  | 0.444725   | 4.952009  | -1.641069 |
| 250.H  | -6.751362  | 9.258178  | 0.483234  |
| 251.H  | -4.414462  | 9.466309  | 0.910956  |
| 252.H  | -2.742807  | 10.360525 | -0.608397 |
| 253.C  | -6.411738  | 1.501935  | 1.472657  |
| 254.H  | 8.499694   | 9.879667  | -0.637192 |
| 255.N  | -2.945466  | 6.090746  | -1.394301 |
| 256.H  | -7.732261  | -6.174520 | 1.239146  |
| 257.H  | -5.320188  | 9.885758  | -1.721965 |
| 258.H  | -1.992595  | -9.964608 | 1.907174  |
| 259.H  | 1.992595   | 9.964608  | 1.907174  |
| 260.H  | -9.881264  | 8.501334  | -0.655026 |
| 261.N  | 6.179174   | -2.875315 | 1.557938  |
| 262.C  | -1.499754  | -6.410065 | 1.466257  |
| 263.H  | 9.964606   | -1.986186 | 1.892260  |
| 264.H  | 9.881264   | -8.501334 | -0.655026 |
| 265.H  | 5.561861   | -7.516447 | -2.346303 |
| 266.H  | 7.515684   | 5.564934  | -2.344233 |
| 267.H  | -5.561861  | 7.516447  | -2.346303 |
| 268.H  | -7.515684  | -5.564934 | -2.344233 |
| 269.H  | -7.597801  | 4.757805  | -1.677611 |
| 270.H  | -4.754501  | -7.602038 | -1.677611 |
| 271.H  | 7.597801   | -4.757805 | -1.677611 |
| 272.H  | 4.754501   | 7.602038  | -1.677611 |
| 273.Na | 0.000000   | 0.000000  | -0.265516 |

| RNA GQ-K <sup>+</sup> (Bond Energy: -39439.14) (Symmetry C2) |           |            |           |
|--------------------------------------------------------------|-----------|------------|-----------|
| 1.C                                                          | 6.439278  | -1.552577  | 1.524094  |
| 2.N                                                          | 5.325555  | -0.849201  | 1.582529  |
| 3.C                                                          | 4.293612  | -1.785012  | 1.641441  |
| 4.C                                                          | 2.881221  | -1.623288  | 1.640036  |
| 5.O                                                          | 2.228363  | -0.549997  | 1.609396  |
| 6.N                                                          | 2.204123  | -2.859721  | 1.655240  |
| 7.C                                                          | 2.819682  | -4.099178  | 1.699727  |
| 8.N                                                          | 2.041155  | -5.197165  | 1.752675  |
| 9.N                                                          | 4.150698  | -4.246025  | 1.699112  |
| 10.C                                                         | 4.816355  | -3.084198  | 1.644090  |
| 11.H                                                         | 10.626327 | -3.748879  | 3.316812  |
| 12.H                                                         | 11.429371 | -4.490640  | 1.912367  |
| 13.H                                                         | 9.372763  | -5.687149  | 2.481217  |
| 14.H                                                         | 9.927200  | -4.947553  | -0.173521 |
| 15.H                                                         | 8.449291  | -3.028319  | 0.013173  |
| 16.O                                                         | 7.118479  | -4.247603  | -1.030096 |
| 17.H                                                         | 6.513516  | -4.934634  | 1.442213  |
| 18.H                                                         | 7.439962  | -1.147932  | 1.466567  |
| 19.H                                                         | 1.166690  | -2.795288  | 1.645923  |
| 20.H                                                         | 1.011759  | -5.174228  | 1.643361  |
| 21.H                                                         | 2.521577  | -6.082507  | 1.630628  |
| 22.P                                                         | 8.210934  | -7.185964  | -0.977763 |
| 23.O                                                         | 8.982387  | -8.579537  | -0.850734 |
| 24.O                                                         | 8.427771  | -6.391509  | -2.223332 |
| 25.O                                                         | 6.684755  | -7.657755  | -0.860667 |
| 26.C                                                         | 6.188445  | -8.447471  | 0.293162  |
| 27.C                                                         | -3.070247 | -1.182416  | -1.693353 |
| 28.C                                                         | 4.740264  | -8.838145  | 0.055833  |
| 29.O                                                         | 3.886666  | -7.656565  | 0.127370  |
| 30.C                                                         | 4.428921  | -9.526732  | -1.299074 |
| 31.O                                                         | 3.539935  | -10.651471 | -1.147996 |
| 32.C                                                         | 3.809850  | -8.395594  | -2.161374 |

|       |           |            |           |
|-------|-----------|------------|-----------|
| 33.C  | 3.102220  | -7.526038  | -1.082798 |
| 34.C  | -4.293612 | 1.785012   | 1.641441  |
| 35.N  | 2.983966  | -6.115167  | -1.379180 |
| 36.C  | -2.881221 | 1.623288   | 1.640036  |
| 37.H  | -4.642316 | 2.473977   | -1.634186 |
| 38.N  | -3.616640 | 0.114598   | -1.671248 |
| 39.N  | -5.196667 | -2.045259  | 1.785385  |
| 40.H  | -6.304357 | 1.928932   | -1.553835 |
| 41.C  | -4.971352 | 0.403341   | -1.618401 |
| 42.O  | -7.710699 | -4.758542  | -2.910193 |
| 43.O  | -1.824204 | -1.343882  | -1.741945 |
| 44.H  | -8.811996 | -3.051617  | -2.809972 |
| 45.C  | 7.943074  | -4.000673  | 0.099344  |
| 46.N  | -2.925949 | -6.196562  | 1.523709  |
| 47.H  | -5.449215 | -5.054373  | -1.227085 |
| 48.H  | -9.349572 | -6.815033  | 0.406407  |
| 49.H  | -9.943847 | -5.304209  | -1.738421 |
| 50.O  | -7.118479 | 4.247603   | -1.030096 |
| 51.C  | 4.017916  | -5.178477  | -1.394903 |
| 52.N  | 3.569360  | -3.950431  | -1.554780 |
| 53.O  | -0.550606 | -2.229850  | 1.604738  |
| 54.C  | -4.098843 | -2.822965  | 1.715022  |
| 55.C  | -3.890593 | -10.562776 | 2.178865  |
| 56.N  | -2.859951 | -2.206201  | 1.668369  |
| 57.C  | 7.120364  | -4.022212  | 1.398519  |
| 58.C  | -5.410667 | -1.797104  | -1.503803 |
| 59.O  | -2.228363 | 0.549997   | 1.609396  |
| 60.H  | -9.973673 | 2.054548   | 1.961268  |
| 61.N  | -5.325555 | 0.849201   | 1.582529  |
| 62.N  | -4.245306 | -4.153976  | 1.700678  |
| 63.C  | -3.083839 | -4.818676  | 1.626557  |
| 64.N  | -5.328605 | 1.697347   | -1.692751 |
| 65.O  | 2.639750  | 10.593197  | 1.453805  |
| 66.C  | 3.890593  | 10.562776  | 2.178865  |
| 67.C  | 4.717767  | 9.312097   | 1.900586  |
| 68.O  | 3.987856  | 8.129208   | 2.395476  |
| 69.C  | 5.017880  | 9.038777   | 0.410839  |
| 70.O  | 6.408048  | 8.538432   | 0.362623  |
| 71.C  | 4.004179  | 7.938884   | 0.059734  |
| 72.C  | 4.019923  | 7.123171   | 1.363436  |
| 73.N  | 2.925949  | 6.196562   | 1.523709  |
| 74.C  | 1.551990  | 6.438566   | 1.472333  |
| 75.N  | 0.849014  | 5.325085   | 1.538211  |
| 76.C  | 1.785135  | 4.295014   | 1.619217  |
| 77.C  | 1.623723  | 2.882866   | 1.635441  |
| 78.O  | 0.550606  | 2.229850   | 1.604738  |
| 79.N  | 2.859951  | 2.206201   | 1.668369  |
| 80.C  | 4.098843  | 2.822965   | 1.715022  |
| 81.N  | 5.196667  | 2.045259   | 1.785385  |
| 82.N  | 4.245306  | 4.153976   | 1.700678  |
| 83.C  | 3.083839  | 4.818676   | 1.626557  |
| 84.H  | 3.713034  | 10.638375  | 3.258425  |
| 85.H  | 4.462152  | 11.438094  | 1.855666  |
| 86.H  | 5.665210  | 9.391398   | 2.445383  |
| 87.H  | 4.944086  | 9.925352   | -0.218481 |
| 88.H  | 3.030078  | 8.439740   | -0.036093 |
| 89.O  | 4.263043  | 7.110408   | -1.064079 |
| 90.H  | 4.933883  | 6.519526   | 1.417809  |
| 91.H  | 1.147412  | 7.438044   | 1.397647  |
| 92.H  | 2.795806  | 1.168745   | 1.664727  |
| 93.H  | 5.174770  | 1.015422   | 1.682015  |
| 94.H  | 6.082751  | 2.524556   | 1.664181  |
| 95.P  | 7.197588  | 8.210924   | -0.992553 |
| 96.O  | 8.587687  | 8.987752   | -0.859853 |
| 97.O  | 6.414566  | 8.415503   | -2.247368 |
| 98.O  | 7.672953  | 6.687309   | -0.858337 |
| 99.C  | 8.451292  | 6.201593   | 0.307163  |
| 100.C | 8.835079  | 4.748075   | 0.091501  |
| 101.O | 7.647245  | 3.903320   | 0.161553  |
| 102.C | 9.534930  | 4.416070   | -1.252976 |
| 103.O | 10.653647 | 3.523242   | -1.080434 |
| 104.C | 8.408538  | 3.792583   | -2.118182 |
| 105.C | 7.525780  | 3.102886   | -1.038852 |
| 106.N | 6.117593  | 2.985326   | -1.348101 |
| 107.C | 5.182503  | 4.020386   | -1.380951 |
| 108.N | 3.955506  | 3.572237   | -1.550352 |
| 109.C | 4.069731  | 2.185235   | -1.625527 |
| 110.C | 3.070247  | 1.182416   | -1.693353 |
| 111.O | 1.824204  | 1.343882   | -1.741945 |
| 112.N | 3.616640  | -0.114598  | -1.671248 |
| 113.C | 4.971352  | -0.403341  | -1.618401 |
| 114.N | 5.328605  | -1.697347  | -1.692751 |
| 115.N | 5.911769  | 0.549352   | -1.516207 |
| 116.C | 5.410667  | -1.797104  | -1.503803 |
| 117.H | 7.823270  | 6.302414   | 1.195121  |
| 118.H | 9.349572  | 6.815033   | 0.406487  |
| 119.H | 9.501201  | 4.482161   | 0.921565  |
| 120.H | 9.943847  | 5.304209   | -1.738421 |
| 121.O | 7.710699  | 4.758542   | -2.910193 |
| 122.H | 8.811996  | 3.051617   | -2.809972 |
| 123.H | 7.889005  | 2.084003   | -0.857080 |
| 124.H | 5.449215  | 5.054373   | -1.227085 |
| 125.H | 2.918919  | -0.882886  | -1.714825 |
| 126.H | 4.642316  | -2.473977  | -1.634186 |
| 127.H | 6.304357  | -1.928932  | -1.553835 |
| 128.O | -4.781492 | 7.686043   | -2.935859 |
| 129.H | -3.079273 | 8.796459   | -2.865607 |
| 130.O | -2.639750 | -10.593197 | 1.453805  |
| 131.H | -2.082228 | 7.894745   | -0.918754 |
| 132.H | -5.051007 | 5.445603   | -1.235492 |
| 133.H | 0.885771  | 2.916148   | -1.728249 |
| 134.H | 2.476013  | 4.642642   | -1.656628 |
| 135.H | 1.927676  | 6.303793   | -1.599867 |
| 136.H | -6.513516 | 4.934634   | 1.442213  |
| 137.H | -7.439962 | 1.147932   | 1.466567  |
| 138.H | 2.763933  | -10.384218 | -0.620774 |
| 139.H | -1.166690 | 2.795288   | 1.645923  |
| 140.C | -4.017916 | 5.178477   | -1.394903 |
| 141.N | -3.569360 | 3.950431   | -1.554780 |
| 142.C | -2.183119 | 4.065290   | -1.640288 |
| 143.C | -1.179974 | 3.065955   | -1.706849 |
| 144.O | -1.341105 | 1.819574   | -1.749757 |
| 145.N | 1.698513  | 5.326460   | -1.732170 |
| 146.N | -0.548429 | 5.909640   | -1.557838 |
| 147.C | -1.795771 | 5.407817   | -1.534556 |
| 148.H | -6.273795 | 7.824833   | 1.186532  |
| 149.H | -1.011759 | 5.174228   | 1.643361  |
| 150.H | 10.374732 | 2.748742   | -0.556936 |
| 151.H | -2.521577 | 6.082507   | 1.630628  |

|       |            |            |           |
|-------|------------|------------|-----------|
| 152.P | -8.210934  | 7.185964   | -0.977763 |
| 153.0 | -8.982387  | 8.579537   | -0.850734 |
| 154.0 | -8.427771  | 6.391509   | -2.223332 |
| 155.0 | -6.684755  | 7.657755   | -0.860667 |
| 156.C | -6.188445  | 8.447471   | 0.293162  |
| 157.N | 0.116669   | 3.613556   | -1.691203 |
| 158.H | -8.497858  | -9.954930  | -0.745564 |
| 159.C | -4.740264  | 8.838145   | 0.055833  |
| 160.0 | -3.886666  | 7.656565   | 0.127370  |
| 161.C | -4.428921  | 9.526732   | -1.299074 |
| 162.C | -4.019923  | -7.123171  | 1.363436  |
| 163.N | -0.849014  | -5.325085  | 1.538211  |
| 164.C | -1.785135  | -4.295014  | 1.619217  |
| 165.H | -7.889005  | -2.084003  | -0.857080 |
| 166.C | -1.623723  | -2.882866  | 1.635441  |
| 167.H | -3.713034  | -10.638375 | 3.258425  |
| 168.H | -4.462152  | -11.438094 | 1.855666  |
| 169.H | -5.665210  | -9.391398  | 2.445383  |
| 170.H | -3.030078  | -8.439740  | -0.036093 |
| 171.0 | -4.263043  | -7.110408  | -1.064079 |
| 172.H | -4.933883  | -6.519526  | 1.417809  |
| 173.H | -1.147412  | -7.438044  | 1.397647  |
| 174.0 | -10.596124 | 2.660569   | 1.520803  |
| 175.H | -9.501201  | -4.482161  | 0.921565  |
| 176.H | -2.918919  | 0.882886   | -1.714825 |
| 177.H | -2.795806  | -1.168745  | 1.664727  |
| 178.H | -5.174770  | -1.015422  | 1.682015  |
| 179.H | -6.082751  | -2.524556  | 1.664181  |
| 180.P | -7.197588  | -8.210924  | -0.992553 |
| 181.0 | -8.587687  | -8.987752  | -0.859853 |
| 182.0 | -6.414566  | -8.415503  | -2.247368 |
| 183.N | -2.204123  | 2.859721   | 1.655240  |
| 184.0 | -7.672953  | -6.687309  | -0.858337 |
| 185.C | -8.451292  | -6.201593  | 0.307163  |
| 186.C | -8.835079  | -4.748075  | 0.091501  |
| 187.0 | -7.647245  | -3.903320  | 0.161553  |
| 188.C | -9.534930  | -4.416070  | -1.252976 |
| 189.0 | -10.653647 | -3.523242  | -1.080434 |
| 190.C | -8.408538  | -3.792583  | -2.118182 |
| 191.0 | -6.408048  | -8.538432  | 0.362623  |
| 192.C | -10.555391 | 3.916987   | 2.235443  |
| 193.N | -5.911769  | -0.549352  | -1.516207 |
| 194.C | -9.301881  | 4.734916   | 1.943413  |
| 195.0 | -8.120312  | 4.001692   | 2.436589  |
| 196.C | -4.004179  | -7.938884  | 0.059734  |
| 197.C | -7.525780  | -3.102886  | -1.038852 |
| 198.N | -6.117593  | -2.985326  | -1.348101 |
| 199.C | -5.182503  | -4.020386  | -1.380951 |
| 200.C | -9.036302  | 5.022025   | 0.449535  |
| 201.H | -4.944086  | -9.925352  | -0.218481 |
| 202.0 | -8.530505  | 6.409645   | 0.387117  |
| 203.C | -7.943074  | 4.000673   | 0.099344  |
| 204.C | -7.120364  | 4.022212   | 1.398519  |
| 205.N | -3.955506  | -3.572237  | -1.550352 |
| 206.C | -2.819682  | 4.099178   | 1.699727  |
| 207.N | -2.041155  | 5.197165   | 1.752675  |
| 208.N | -4.150698  | 4.246025   | 1.699112  |
| 209.C | -4.816355  | 3.084198   | 1.644090  |
| 210.H | -10.626327 | 3.748879   | 3.316812  |
| 211.C | -4.069731  | -2.185235  | -1.625527 |
| 212.C | -4.717767  | -9.312097  | 1.900586  |
| 213.0 | -3.987856  | -8.129208  | 2.395476  |
| 214.N | -6.195533  | 2.926863   | 1.560576  |
| 215.C | -5.017880  | -9.038777  | 0.410839  |
| 216.H | -11.429371 | 4.490640   | 1.912367  |
| 217.0 | 10.596124  | -2.660569  | 1.520803  |
| 218.H | -9.372763  | 5.687149   | 2.481217  |
| 219.C | 10.555391  | -3.916987  | 2.235443  |
| 220.C | 9.301881   | -4.734916  | 1.943413  |
| 221.0 | 8.120312   | -4.001692  | 2.436589  |
| 222.H | -9.927200  | 4.947553   | -0.173521 |
| 223.C | 9.036302   | -5.022025  | 0.449535  |
| 224.H | -8.449291  | 3.028319   | 0.013173  |
| 225.H | -10.374732 | -2.748742  | -0.556936 |
| 226.0 | 8.530505   | -6.409645  | 0.387117  |
| 227.C | 2.183119   | -4.065290  | -1.640288 |
| 228.C | 1.179974   | -3.065955  | -1.706649 |
| 229.0 | 1.341105   | -1.819574  | -1.749757 |
| 230.N | -0.116669  | -3.613556  | -1.691203 |
| 231.C | -0.404532  | -4.968684  | -1.652336 |
| 232.N | -1.698513  | -5.326460  | -1.732170 |
| 233.N | 0.548429   | -5.909640  | -1.557838 |
| 234.C | 1.795771   | -5.407817  | -1.534556 |
| 235.H | 6.273795   | -7.824833  | 1.186532  |
| 236.H | 6.805538   | -9.343065  | 0.394344  |
| 237.H | 4.467707   | -9.513341  | 0.876016  |
| 238.H | 5.325122   | -9.926111  | -1.777563 |
| 239.0 | 4.781492   | -7.686043  | -2.935859 |
| 240.H | 3.079273   | -8.796459  | -2.865607 |
| 241.H | 2.082228   | -7.894745  | -0.918754 |
| 242.H | 5.051007   | -5.445603  | -1.235492 |
| 243.H | -0.885771  | -2.916148  | -1.728249 |
| 244.H | -2.476013  | -4.642642  | -1.656628 |
| 245.H | -1.927676  | -6.303793  | -1.599867 |
| 246.0 | -3.539935  | 10.651471  | -1.147996 |
| 247.C | -3.809850  | 8.395594   | -2.161374 |
| 248.C | -3.102220  | 7.526038   | -1.082798 |
| 249.C | 0.404532   | 4.968684   | -1.652336 |
| 250.H | -6.805538  | 9.343065   | 0.394344  |
| 251.H | -4.467707  | 9.513341   | 0.876016  |
| 252.H | -2.763933  | 10.384218  | -0.620774 |
| 253.C | -6.439278  | 1.552577   | 1.524094  |
| 254.H | 8.497858   | 9.954930   | -0.745564 |
| 255.N | -2.983966  | 6.115167   | -1.379180 |
| 256.H | -7.823270  | -6.302414  | 1.195121  |
| 257.H | -5.325122  | 9.926111   | -1.777563 |
| 258.H | -2.034327  | -9.967662  | 1.890729  |
| 259.H | 2.034327   | 9.967662   | 1.890729  |
| 260.H | -9.944379  | 8.494899   | -0.696296 |
| 261.N | 6.195533   | -2.926863  | 1.560576  |
| 262.C | -1.551990  | -6.438566  | 1.472333  |
| 263.H | 9.973673   | -2.054548  | 1.961268  |
| 264.H | 9.944579   | -8.494899  | -0.698296 |
| 265.H | 5.579348   | -7.553018  | -2.381542 |
| 266.H | 7.577390   | 5.563840   | -2.366790 |
| 267.H | -5.579348  | 7.553018   | -2.381542 |
| 268.H | -7.577390  | -5.563840  | -2.366790 |
| 269.H | -7.626843  | 4.773166   | -1.691333 |
| 270.H | -4.786121  | -7.620280  | -1.725780 |

|       |          |           |           |
|-------|----------|-----------|-----------|
| 271.H | 7.626843 | -4.773166 | -1.691333 |
| 272.H | 4.786121 | 7.620280  | -1.725780 |
| 273.K | 0.000000 | 0.000000  | -0.051564 |

| RNA GQ-Rb <sup>+</sup> -39433.62 (Symmetry C2) |            |            |           |
|------------------------------------------------|------------|------------|-----------|
| 1.C                                            | 6.480302   | -1.477401  | 1.471349  |
| 2.N                                            | 5.359596   | -0.784749  | 1.530511  |
| 3.C                                            | 4.338319   | -1.731606  | 1.597210  |
| 4.C                                            | 2.925505   | -1.584480  | 1.619071  |
| 5.O                                            | 2.262244   | -0.517055  | 1.605653  |
| 6.N                                            | 2.259451   | -2.827891  | 1.635982  |
| 7.C                                            | 2.887504   | -4.062141  | 1.667365  |
| 8.N                                            | 2.122149   | -5.169754  | 1.720605  |
| 9.N                                            | 4.220085   | -4.194461  | 1.656293  |
| 10.C                                           | 4.873348   | -3.025569  | 1.600000  |
| 11.H                                           | 10.748902  | -3.548752  | 3.143928  |
| 12.H                                           | 11.508403  | -4.371067  | 1.760480  |
| 13.H                                           | 9.482692   | -5.537937  | 2.462297  |
| 14.H                                           | 9.929957   | -4.953155  | -0.248239 |
| 15.H                                           | 8.462419   | -3.012314  | -0.096114 |
| 16.O                                           | 7.098642   | -4.275843  | -1.039886 |
| 17.H                                           | 6.586714   | -4.859623  | 1.480761  |
| 18.H                                           | 7.477142   | -1.064082  | 1.410139  |
| 19.H                                           | 1.221735   | -2.777219  | 1.641578  |
| 20.H                                           | 1.093529   | -5.158100  | 1.613172  |
| 21.H                                           | 2.613505   | -6.047328  | 1.574334  |
| 22.P                                           | 8.130909   | -7.208708  | -0.851499 |
| 23.O                                           | 8.825418   | -8.633753  | -0.653476 |
| 24.O                                           | 8.343444   | -6.510608  | -2.153722 |
| 25.O                                           | 6.584356   | -7.584831  | -0.658256 |
| 26.C                                           | 6.080150   | -8.261772  | 0.561364  |
| 27.C                                           | -3.096128  | -1.178432  | -1.933009 |
| 28.C                                           | 4.648858   | -8.720557  | 0.338443  |
| 29.O                                           | 3.747310   | -7.573266  | 0.300201  |
| 30.C                                           | 4.382652   | -9.527538  | -0.957671 |
| 31.O                                           | 3.508924   | -10.651226 | -0.729486 |
| 32.C                                           | 3.764177   | -8.489000  | -1.931657 |
| 33.C                                           | 3.024913   | -7.528384  | -0.955269 |
| 34.C                                           | -4.338319  | 1.731608   | 1.597210  |
| 35.N                                           | 2.937674   | -6.143296  | -1.365587 |
| 36.C                                           | -2.925505  | 1.584480   | 1.619071  |
| 37.H                                           | -4.620672  | 2.502859   | -1.748007 |
| 38.N                                           | -3.624837  | 0.126795   | -1.882800 |
| 39.N                                           | -5.170320  | -2.122919  | 1.724963  |
| 40.H                                           | -6.277443  | 1.972743   | -1.581400 |
| 41.C                                           | -4.969584  | 0.432566   | -1.736922 |
| 42.O                                           | -7.843214  | -4.716699  | -2.784025 |
| 43.O                                           | -1.859348  | -1.355426  | -2.078136 |
| 44.H                                           | -8.953223  | -3.023712  | -2.608274 |
| 45.C                                           | 7.960724   | -3.979772  | 0.049235  |
| 46.N                                           | -2.854335  | -6.249006  | 1.485925  |
| 47.H                                           | -5.479876  | -5.012461  | -1.233311 |
| 48.H                                           | -9.146251  | -6.737495  | 0.710675  |
| 49.H                                           | -9.957066  | -5.278148  | -1.416105 |
| 50.O                                           | -7.098642  | 4.275843   | -1.039886 |
| 51.C                                           | 3.983817   | -5.220190  | -1.417499 |
| 52.N                                           | 3.554273   | -3.999592  | -1.664145 |
| 53.O                                           | -0.517758  | -2.261880  | 1.606507  |
| 54.C                                           | -4.062748  | -2.887971  | 1.663669  |
| 55.C                                           | -3.784375  | -10.640888 | 2.042975  |
| 56.N                                           | -2.828639  | -2.259492  | 1.636972  |
| 57.C                                           | 7.182388   | -3.945052  | 1.374270  |
| 58.C                                           | -5.425779  | -1.761804  | -1.578588 |
| 59.O                                           | -2.262244  | 0.517055   | 1.605653  |
| 60.H                                           | -10.052942 | 1.934748   | 1.714938  |
| 61.N                                           | -5.359596  | 0.784749   | 1.530511  |
| 62.N                                           | -4.194895  | -4.220360  | 1.642102  |
| 63.C                                           | -3.025860  | -4.873083  | 1.581330  |
| 64.N                                           | -5.314457  | 1.732003   | -1.781147 |
| 65.O                                           | 2.567292   | 10.652978  | 1.252250  |
| 66.C                                           | 3.784375   | 10.640888  | 2.042975  |
| 67.C                                           | 4.621233   | 9.382691   | 1.838785  |
| 68.O                                           | 3.871010   | 8.214036   | 2.339793  |
| 69.C                                           | 4.983172   | 9.061452   | 0.372732  |
| 70.O                                           | 6.370379   | 8.549679   | 0.402633  |
| 71.C                                           | 3.977091   | 7.957707   | 0.014110  |
| 72.C                                           | 3.945821   | 7.180140   | 1.339352  |
| 73.N                                           | 2.854335   | 6.249006   | 1.485925  |
| 74.C                                           | 1.477717   | 6.478888   | 1.440662  |
| 75.N                                           | 0.785148   | 5.358746   | 1.509852  |
| 76.C                                           | 1.732031   | 4.338051   | 1.584219  |
| 77.C                                           | 1.584969   | 2.925405   | 1.615754  |
| 78.O                                           | 0.517758   | 2.261880   | 1.606507  |
| 79.N                                           | 2.828639   | 2.259492   | 1.636972  |
| 80.C                                           | 4.062748   | 2.887971   | 1.663669  |
| 81.N                                           | 5.170320   | 2.122919   | 1.724963  |
| 82.N                                           | 4.194895   | 4.220360   | 1.642102  |
| 83.C                                           | 3.025860   | 4.873083   | 1.581330  |
| 84.H                                           | 3.559062   | 10.747869  | 3.110859  |
| 85.H                                           | 4.372272   | 11.505985  | 1.721274  |
| 86.H                                           | 5.544260   | 9.480340   | 2.421008  |
| 87.H                                           | 4.946687   | 9.927605   | -0.287124 |
| 88.H                                           | 3.009048   | 8.458714   | -0.130056 |
| 89.O                                           | 4.272855   | 7.094367   | -1.073795 |
| 90.H                                           | 4.860035   | 6.583361   | 1.442941  |
| 91.H                                           | 1.063921   | 7.474993   | 1.370840  |
| 92.H                                           | 2.777862   | 1.221772   | 1.647227  |
| 93.H                                           | 5.159269   | 1.093485   | 1.624397  |
| 94.H                                           | 6.048293   | 2.613100   | 1.578167  |
| 95.P                                           | 7.203854   | 8.138634   | -0.901910 |
| 96.O                                           | 8.623194   | 8.048391   | -0.712660 |
| 97.O                                           | 6.498760   | 8.344738   | -2.281249 |
| 98.O                                           | 7.596671   | 6.596256   | -0.707606 |
| 99.C                                           | 8.277836   | 6.104537   | 0.514825  |
| 100.C                                          | 8.722871   | 4.666345   | 0.311465  |
| 101.O                                          | 7.566556   | 3.775869   | 0.286172  |
| 102.C                                          | 9.527198   | 4.374064   | -0.980773 |
| 103.O                                          | 10.643633  | 3.494061   | -0.739906 |
| 104.C                                          | 8.482305   | 3.750707   | -1.944687 |
| 105.C                                          | 7.520308   | 3.030066   | -0.955608 |
| 106.N                                          | 6.135310   | 2.939471   | -1.364576 |
| 107.C                                          | 5.212786   | 3.985184   | -1.427833 |
| 108.N                                          | 3.993104   | 3.553764   | -1.676006 |
| 109.C                                          | 4.098351   | 2.167149   | -1.770653 |
| 110.C                                          | 3.096128   | 1.178432   | -1.933009 |

|       |            |            |           |
|-------|------------|------------|-----------|
| 111.0 | 1.859348   | 1.355426   | -2.078136 |
| 112.N | 3.624837   | -0.126795  | -1.882800 |
| 113.C | 4.969584   | -0.432566  | -1.736922 |
| 114.N | 5.314457   | -1.732003  | -1.781147 |
| 115.N | 5.912820   | 0.508511   | -1.575841 |
| 116.C | 5.425779   | 1.761804   | -1.578588 |
| 117.H | 7.566419   | 6.169519   | 1.341137  |
| 118.H | 9.146251   | 6.737495   | 0.710675  |
| 119.H | 9.332695   | 4.411302   | 1.186403  |
| 120.H | 9.957066   | 5.278148   | -1.416105 |
| 121.0 | 7.843214   | 4.716699   | -2.784025 |
| 122.H | 8.953223   | 3.023712   | -2.608274 |
| 123.H | 7.859541   | 2.001168   | -0.789094 |
| 124.H | 5.479876   | 5.012461   | -1.233311 |
| 125.H | 2.927705   | -0.889675  | -1.979170 |
| 126.H | 4.620672   | -2.502859  | -1.748007 |
| 127.H | 6.277443   | -1.972743  | -1.581400 |
| 128.0 | -4.734822  | 7.846625   | -2.763066 |
| 129.H | -3.048529  | 8.967353   | -2.602038 |
| 130.0 | -2.567292  | -10.652978 | 1.262250  |
| 131.H | -1.992854  | 7.869428   | -0.806571 |
| 132.H | -5.009469  | 5.487735   | -1.215458 |
| 133.H | 0.886409   | 2.931258   | -1.987658 |
| 134.H | 2.500841   | 4.623420   | -1.766320 |
| 135.H | 1.973284   | 6.281654   | -1.608326 |
| 136.H | -6.586714  | 4.859623   | 1.480761  |
| 137.H | -7.477142  | 1.064082   | 1.410139  |
| 138.H | 2.716464   | -10.353431 | -0.244772 |
| 139.H | -1.221735  | 2.777219   | 1.641578  |
| 140.C | -3.983817  | 5.220190   | -1.417499 |
| 141.N | -3.554273  | 3.999592   | -1.664145 |
| 142.C | -2.168356  | 4.104417   | -1.768466 |
| 143.C | -1.181002  | 3.101109   | -1.931013 |
| 144.0 | -1.359491  | 1.863712   | -2.069193 |
| 145.N | 1.731062   | 5.318282   | -1.804516 |
| 146.N | -0.508149  | 5.919024   | -1.591005 |
| 147.C | -1.761589  | 5.432516   | -1.584452 |
| 148.H | -6.126300  | 7.543160   | 1.382619  |
| 149.H | -1.093529  | 5.158100   | 1.613172  |
| 150.H | 10.341121  | 2.714399   | -0.237579 |
| 151.H | -2.613505  | 6.047328   | 1.574334  |
| 152.P | -8.130909  | 7.208708   | -0.851499 |
| 153.0 | -8.825418  | 8.633753   | -0.653476 |
| 154.0 | -8.343444  | 6.510608   | -2.153722 |
| 155.0 | -6.584356  | 7.584831   | -0.658256 |
| 156.C | -6.080150  | 8.261772   | 0.561364  |
| 157.N | 0.124539   | 3.629150   | -1.890110 |
| 158.H | -8.575835  | -9.820668  | -0.618222 |
| 159.C | -4.648858  | 8.720557   | 0.338443  |
| 160.0 | -3.747310  | 7.573266   | 0.380201  |
| 161.C | -4.382652  | 9.527538   | -0.957671 |
| 162.C | -3.945821  | -7.180140  | 1.339352  |
| 163.N | -0.785148  | -5.358746  | 1.509852  |
| 164.C | -1.732031  | -4.338051  | 1.584219  |
| 165.H | -7.859541  | -2.001168  | -0.789094 |
| 166.C | -1.584969  | -2.925405  | 1.615754  |
| 167.H | -3.559062  | -10.747869 | 3.110859  |
| 168.H | -4.372272  | -11.505985 | 1.721274  |
| 169.H | -5.544260  | -9.480340  | 2.421008  |
| 170.H | -3.009048  | -8.458714  | -0.130056 |
| 171.0 | -4.272855  | -7.094367  | -1.073795 |
| 172.H | -4.860035  | -6.583361  | 1.442941  |
| 173.H | -1.063921  | -7.474993  | 1.370840  |
| 174.0 | -10.658836 | 2.567546   | 1.289422  |
| 175.H | -9.332695  | -4.411302  | 1.186403  |
| 176.H | -2.927705  | 0.889675   | -1.979170 |
| 177.H | -2.777862  | -1.221772  | 1.647227  |
| 178.H | -5.159269  | -1.093485  | 1.624397  |
| 179.H | -6.048293  | -2.613180  | 1.578167  |
| 180.P | -7.203854  | -8.138634  | -0.901910 |
| 181.0 | -8.623184  | -8.848391  | -0.712660 |
| 182.0 | -6.498760  | -8.344738  | -2.201249 |
| 183.N | -2.259451  | 2.827891   | 1.635982  |
| 184.0 | -7.596671  | -6.596256  | -0.707606 |
| 185.C | -8.277836  | -6.104537  | 0.514825  |
| 186.C | -8.722871  | -4.666345  | 0.311465  |
| 187.0 | -7.566556  | -3.775869  | 0.286172  |
| 188.C | -9.527198  | -4.374064  | -0.980773 |
| 189.0 | -10.643633 | -3.494061  | -0.739906 |
| 190.C | -8.482305  | -3.750707  | -1.944687 |
| 191.0 | -6.370379  | -8.549679  | 0.402633  |
| 192.C | -10.643590 | 3.780198   | 2.077203  |
| 193.N | -5.912820  | -0.508511  | -1.575841 |
| 194.C | -9.385097  | 4.617290   | 1.876182  |
| 195.0 | -8.216126  | 3.865278   | 2.374278  |
| 196.C | -3.977091  | -7.957707  | 0.014110  |
| 197.C | -7.520308  | -3.030066  | -0.955608 |
| 198.N | -6.135310  | -2.939471  | -1.364576 |
| 199.C | -5.212786  | -3.985184  | -1.427833 |
| 200.C | -9.063501  | 4.985571   | 0.411684  |
| 201.H | -4.946687  | -9.927605  | -0.287124 |
| 202.0 | -8.550555  | 6.372432   | 0.448405  |
| 203.C | -7.960724  | 3.979772   | 0.049235  |
| 204.C | -7.182388  | 3.945052   | 1.374270  |
| 205.N | -3.993104  | -3.553764  | -1.676006 |
| 206.C | -2.887504  | 4.062141   | 1.667365  |
| 207.N | -2.122149  | 5.169754   | 1.720605  |
| 208.N | -4.220085  | 4.194461   | 1.656293  |
| 209.C | -4.873348  | 3.025569   | 1.600000  |
| 210.H | -10.748902 | 3.548752   | 3.143928  |
| 211.C | -4.098351  | -2.167149  | -1.770653 |
| 212.C | -4.621233  | -9.382691  | 1.838785  |
| 213.0 | -3.871010  | -8.214036  | 2.339793  |
| 214.N | -6.250078  | 2.853909   | 1.516101  |
| 215.C | -4.983172  | -9.061452  | 0.372732  |
| 216.H | -11.508403 | 4.371067   | 1.760480  |
| 217.0 | 10.658836  | -2.567546  | 1.289422  |
| 218.H | -9.482692  | 5.537937   | 2.462297  |
| 219.C | 10.643590  | -3.780198  | 2.077203  |
| 220.C | 9.385097   | -4.617290  | 1.876182  |
| 221.0 | 8.216126   | -3.865278  | 2.374278  |
| 222.H | -9.929057  | 4.953155   | -0.248239 |
| 223.C | 9.063501   | -4.985571  | 0.411684  |
| 224.H | -8.462419  | 3.012314   | -0.096114 |
| 225.H | -10.341121 | -2.714399  | -0.237579 |
| 226.0 | 8.550555   | -6.372432  | 0.448405  |
| 227.C | 2.168356   | -4.104417  | -1.768466 |
| 228.C | 1.181002   | -3.101109  | -1.931013 |
| 229.0 | 1.359491   | -1.863712  | -2.069193 |



|        |           |            |           |
|--------|-----------|------------|-----------|
| 230.N  | -0.124539 | -3.629150  | -1.890110 |
| 231.C  | -0.431582 | -4.974621  | -1.752284 |
| 232.N  | -1.731062 | -5.318282  | -1.804516 |
| 233.N  | 0.508149  | -5.919024  | -1.591005 |
| 234.C  | 1.761589  | -5.432516  | -1.584452 |
| 235.H  | 6.126300  | -7.543160  | 1.382619  |
| 236.H  | 6.717294  | -9.123287  | 0.773874  |
| 237.H  | 4.386474  | -9.332441  | 1.209421  |
| 238.H  | 5.296737  | -9.949575  | -1.379545 |
| 239.O  | 4.734822  | -7.846625  | -2.763066 |
| 240.H  | 3.048529  | -8.967353  | -2.602038 |
| 241.H  | 1.992854  | -7.869428  | -0.806571 |
| 242.H  | 5.009469  | -5.487735  | -1.215458 |
| 243.H  | -0.886409 | -2.931258  | -1.987658 |
| 244.H  | -2.500841 | -4.623420  | -1.766320 |
| 245.H  | -1.973284 | -6.281654  | -1.608326 |
| 246.O  | -3.508924 | 10.651226  | -0.729486 |
| 247.C  | -3.764177 | 8.489000   | -1.931657 |
| 248.C  | -3.024013 | 7.528384   | -0.955269 |
| 249.C  | 0.431582  | 4.974621   | -1.752284 |
| 250.H  | -6.717294 | 9.123287   | 0.773874  |
| 251.H  | -4.386474 | 9.332441   | 1.209421  |
| 252.H  | -2.716464 | 10.353431  | -0.244772 |
| 253.C  | -6.480302 | 1.477401   | 1.471349  |
| 254.H  | 8.575635  | 9.820668   | -0.618222 |
| 255.N  | -2.937674 | 6.143296   | -1.365587 |
| 256.H  | -7.566419 | -6.169519  | 1.341137  |
| 257.H  | -5.296737 | 9.949575   | -1.379545 |
| 258.H  | -1.939647 | -10.043436 | 1.690248  |
| 259.H  | 1.939647  | 10.043436  | 1.690248  |
| 260.H  | -9.799420 | 8.598003   | -0.572653 |
| 261.N  | 6.250078  | -2.853909  | 1.516101  |
| 262.C  | -1.477717 | -6.478888  | 1.440662  |
| 263.H  | 10.052942 | -1.934748  | 1.714938  |
| 264.H  | 9.799420  | -8.598003  | -0.572653 |
| 265.H  | 5.521600  | -7.643846  | -2.214606 |
| 266.H  | 7.645026  | 5.510149   | -2.243335 |
| 267.H  | -5.521600 | 7.643846   | -2.214606 |
| 268.H  | -7.645026 | -5.510149  | -2.243335 |
| 269.H  | -7.587296 | 4.820529   | -1.698964 |
| 270.H  | -4.807086 | -7.586888  | -1.738289 |
| 271.H  | 7.587296  | -4.820529  | -1.698964 |
| 272.H  | 4.807086  | 7.586888   | -1.738289 |
| 273.Rb | 0.000000  | 0.000000   | -0.212342 |

| RNA GQ-Cs* (Bond Energy: -39427.21) (Symmetry C2) |            |            |           |
|---------------------------------------------------|------------|------------|-----------|
| 1.C                                               | 6.496925   | -1.463861  | 1.476526  |
| 2.N                                               | 5.379101   | -0.772673  | 1.586839  |
| 3.C                                               | 4.360678   | -1.721767  | 1.666674  |
| 4.C                                               | 2.950668   | -1.575484  | 1.754943  |
| 5.O                                               | 2.287216   | -0.508903  | 1.803792  |
| 6.N                                               | 2.283477   | -2.819542  | 1.756769  |
| 7.C                                               | 2.911242   | -4.054739  | 1.731498  |
| 8.N                                               | 2.147227   | -5.163624  | 1.782198  |
| 9.N                                               | 4.242659   | -4.185851  | 1.670739  |
| 10.C                                              | 4.894574   | -3.015549  | 1.622160  |
| 11.H                                              | 10.796016  | -3.520649  | 3.041759  |
| 12.H                                              | 11.531785  | -4.336172  | 1.641647  |
| 13.H                                              | 9.529372   | -5.515425  | 2.387201  |
| 14.H                                              | 9.918319   | -4.939571  | -0.331750 |
| 15.H                                              | 8.455129   | -2.996765  | -0.152634 |
| 16.O                                              | 7.075150   | -4.259147  | -1.073718 |
| 17.H                                              | 6.605373   | -4.845829  | 1.452319  |
| 18.H                                              | 7.491270   | -1.048953  | 1.390962  |
| 19.H                                              | 1.247195   | -2.771565  | 1.804577  |
| 20.H                                              | 1.117225   | -5.153032  | 1.693649  |
| 21.H                                              | 2.636754   | -6.037402  | 1.607486  |
| 22.P                                              | 8.101731   | -7.197704  | -0.889338 |
| 23.O                                              | 8.797093   | -8.623634  | -0.702260 |
| 24.O                                              | 8.285330   | -6.506933  | -2.199319 |
| 25.O                                              | 6.559518   | -7.570269  | -0.656120 |
| 26.C                                              | 6.084838   | -8.227015  | 0.585951  |
| 27.C                                              | -3.124070  | -1.192618  | -2.097450 |
| 28.C                                              | 4.646864   | -8.684459  | 0.408526  |
| 29.O                                              | 3.748450   | -7.534426  | 0.367369  |
| 30.C                                              | 4.344953   | -9.517886  | -0.862403 |
| 31.O                                              | 3.470140   | -10.630487 | -0.588825 |
| 32.C                                              | 3.710607   | -8.496803  | -1.844754 |
| 33.C                                              | 2.999894   | -7.508390  | -0.872187 |
| 34.C                                              | -4.360678  | 1.721767   | 1.666674  |
| 35.N                                              | 2.919925   | -6.132054  | -1.312861 |
| 36.C                                              | -2.950668  | 1.575484   | 1.754943  |
| 37.H                                              | -4.607270  | 2.507698   | -1.810716 |
| 38.N                                              | -3.638646  | 0.118874   | -2.025882 |
| 39.N                                              | -5.163897  | -2.145411  | 1.779917  |
| 40.H                                              | -6.254489  | 1.987425   | -1.564082 |
| 41.C                                              | -4.969287  | 0.437376   | -1.789880 |
| 42.O                                              | -7.881959  | -4.668522  | -2.716035 |
| 43.O                                              | -1.904493  | -1.382961  | -2.340540 |
| 44.H                                              | -8.984526  | -2.976938  | -2.494316 |
| 45.C                                              | 7.955618   | -3.964072  | 0.000868  |
| 46.N                                              | -2.841230  | -6.266138  | 1.499581  |
| 47.H                                              | -5.487161  | -4.996658  | -1.189544 |
| 48.H                                              | -9.101201  | -6.723285  | 0.787512  |
| 49.H                                              | -9.960658  | -5.245144  | -1.303245 |
| 50.O                                              | -7.075150  | 4.259147   | -1.073718 |
| 51.C                                              | 3.972668   | -5.220501  | -1.407293 |
| 52.N                                              | 3.553399   | -4.012654  | -1.724885 |
| 53.O                                              | -0.509279  | -2.285281  | 1.802654  |
| 54.C                                              | -4.055180  | -2.909487  | 1.727909  |
| 55.C                                              | -3.770079  | -10.680887 | 1.997292  |
| 56.N                                              | -2.819902  | -2.281695  | 1.753976  |
| 57.C                                              | 7.199163   | -3.931044  | 1.337990  |
| 58.C                                              | -5.429725  | -1.751653  | -1.579231 |
| 59.O                                              | -2.287216  | 0.508903   | 1.803792  |
| 60.H                                              | -10.063792 | 1.907341   | 1.632800  |
| 61.N                                              | -5.379101  | 0.772673   | 1.586839  |
| 62.N                                              | -4.185914  | -4.240937  | 1.666929  |
| 63.C                                              | -3.015425  | -4.892750  | 1.620277  |
| 64.N                                              | -5.304825  | 1.739391   | -1.812813 |
| 65.O                                              | 2.560830   | 10.676124  | 1.204404  |
| 66.C                                              | 3.770079   | 10.680887  | 1.997292  |
| 67.C                                              | 4.605364   | 9.405315   | 1.816215  |
| 68.O                                              | 3.851104   | 8.244048   | 2.328826  |
| 69.C                                              | 4.976257   | 9.062924   | 0.357109  |

|       |            |            |           |
|-------|------------|------------|-----------|
| 70.O  | 6.361574   | 8.546791   | 0.404953  |
| 71.C  | 3.967851   | 7.958065   | 0.007589  |
| 72.C  | 3.931172   | 7.197439   | 1.342211  |
| 73.N  | 2.841230   | 6.266138   | 1.499581  |
| 74.C  | 1.463807   | 6.495476   | 1.479443  |
| 75.N  | 0.772554   | 5.377548   | 1.588506  |
| 76.C  | 1.721653   | 4.358911   | 1.665719  |
| 77.C  | 1.575631   | 2.948794   | 1.752959  |
| 78.O  | 0.509279   | 2.285281   | 1.802654  |
| 79.N  | 2.819902   | 2.281695   | 1.753976  |
| 80.C  | 4.055180   | 2.909487   | 1.727909  |
| 81.N  | 5.163897   | 2.145411   | 1.779917  |
| 82.N  | 4.185914   | 4.240937   | 1.666929  |
| 83.C  | 3.015425   | 4.892750   | 1.620277  |
| 84.H  | 3.534508   | 10.788056  | 3.061441  |
| 85.H  | 4.364660   | 11.527238  | 1.671687  |
| 86.H  | 5.524695   | 9.509743   | 2.403074  |
| 87.H  | 4.948311   | 9.920169   | -0.314602 |
| 88.H  | 3.002095   | 8.460644   | -0.146005 |
| 89.O  | 4.262953   | 7.079879   | -1.068695 |
| 90.H  | 4.845973   | 6.603439   | 1.456136  |
| 91.H  | 1.049307   | 7.490233   | 1.396966  |
| 92.H  | 2.772020   | 1.245221   | 1.802565  |
| 93.H  | 5.153719   | 1.115306   | 1.691649  |
| 94.H  | 6.038238   | 2.634665   | 1.607514  |
| 95.P  | 7.201906   | 8.105373   | -0.884986 |
| 96.O  | 8.626302   | 8.804996   | -0.697613 |
| 97.O  | 6.508561   | 8.293932   | -2.193317 |
| 98.O  | 7.579106   | 6.563316   | -0.658707 |
| 99.C  | 8.237861   | 6.086451   | 0.581714  |
| 100.C | 8.690577   | 4.647343   | 0.402447  |
| 101.O | 7.537609   | 3.752747   | 0.361709  |
| 102.C | 9.522419   | 4.344358   | -0.869442 |
| 103.O | 10.634239  | 3.468036   | -0.597456 |
| 104.C | 8.499002   | 3.711902   | -1.850371 |
| 105.C | 7.511212   | 3.002364   | -0.876613 |
| 106.N | 6.134797   | 2.921605   | -1.316818 |
| 107.C | 5.223294   | 3.974283   | -1.412135 |
| 108.N | 4.015225   | 3.554675   | -1.728422 |
| 109.C | 4.117095   | 2.169014   | -1.836469 |
| 110.C | 3.124070   | 1.192618   | -2.097450 |
| 111.O | 1.904493   | 1.382961   | -2.340540 |
| 112.N | 3.638646   | -0.118874  | -2.025882 |
| 113.C | 4.969287   | -0.437376  | -1.789880 |
| 114.N | 5.304825   | -1.739391  | -1.812813 |
| 115.N | 5.907244   | 0.494937   | -1.564533 |
| 116.C | 5.429725   | 1.751653   | -1.579231 |
| 117.H | 7.510630   | 6.158517   | 1.393440  |
| 118.H | 9.101201   | 6.723285   | 0.787512  |
| 119.H | 9.281430   | 4.402260   | 1.292955  |
| 120.H | 9.960658   | 5.245144   | -1.303245 |
| 121.O | 7.881959   | 4.668522   | -2.716035 |
| 122.H | 8.984526   | 2.976938   | -2.494316 |
| 123.H | 7.838184   | 1.971306   | -0.698790 |
| 124.H | 5.487161   | 4.996658   | -1.189544 |
| 125.H | 2.951378   | -0.877312  | -2.189400 |
| 126.H | 4.607270   | -2.507698  | -1.810716 |
| 127.H | 6.254489   | -1.987425  | -1.564082 |
| 128.O | -4.665676  | 7.879506   | -2.711706 |
| 129.H | -2.976391  | 8.984789   | -2.487826 |
| 130.O | -2.560830  | -10.676124 | 1.204404  |
| 131.H | -1.968620  | 7.835065   | -0.695355 |
| 132.H | -4.994715  | 5.484019   | -1.183047 |
| 133.H | 0.878485   | 2.949260   | -2.190280 |
| 134.H | 2.508696   | 4.606662   | -1.813548 |
| 135.H | 1.987356   | 6.252642   | -1.563918 |
| 136.H | -6.605373  | 4.845829   | 1.452319  |
| 137.H | -7.491270  | 1.048953   | 1.390962  |
| 138.H | 2.686630   | -10.315988 | -0.100042 |
| 139.H | -1.247195  | 2.771565   | 1.804577  |
| 140.C | -3.972668  | 5.220501   | -1.407293 |
| 141.N | -3.553399  | 4.012654   | -1.724885 |
| 142.C | -2.167875  | 4.114707   | -1.834650 |
| 143.C | -1.191719  | 3.122227   | -2.097861 |
| 144.O | -1.382512  | 1.902773   | -2.342019 |
| 145.N | 1.740173   | 5.303833   | -1.816909 |
| 146.N | -0.493749  | 5.904859   | -1.564551 |
| 147.C | -1.750328  | 5.427157   | -1.577083 |
| 148.H | -6.154596  | 7.496591   | 1.394995  |
| 149.H | -1.117225  | 5.153032   | 1.693649  |
| 150.H | 10.319646  | 2.685840   | -0.106597 |
| 151.H | -2.636754  | 6.037402   | 1.607486  |
| 152.P | -8.101731  | 7.197704   | -0.889338 |
| 153.O | -8.797093  | 8.623634   | -0.702260 |
| 154.O | -8.285330  | 6.506033   | -2.199319 |
| 155.O | -6.559518  | 7.570269   | -0.656120 |
| 156.C | -6.084838  | 8.227015   | 0.585951  |
| 157.N | 0.119836   | 3.636407   | -2.026647 |
| 158.H | -8.589387  | -9.781008  | -0.645013 |
| 159.C | -4.646864  | 8.684459   | 0.408526  |
| 160.O | -3.748450  | 7.534426   | 0.367369  |
| 161.C | -4.344953  | 9.517886   | -0.862403 |
| 162.C | -3.931172  | -7.197439  | 1.342211  |
| 163.N | -0.772554  | -5.377548  | 1.588506  |
| 164.C | -1.721653  | -4.358911  | 1.665719  |
| 165.H | -7.838184  | -1.971306  | -0.698790 |
| 166.C | -1.575631  | -2.948794  | 1.752959  |
| 167.H | -3.534508  | -10.788056 | 3.061441  |
| 168.H | -4.364660  | -11.527238 | 1.671687  |
| 169.H | -5.524695  | -9.509743  | 2.403074  |
| 170.H | -3.002095  | -8.460644  | -0.146005 |
| 171.O | -4.262953  | -7.079879  | -1.068695 |
| 172.H | -4.845973  | -6.603439  | 1.456136  |
| 173.H | -1.049307  | -7.490233  | 1.396966  |
| 174.O | -10.661549 | 2.537050   | 1.191554  |
| 175.H | -9.281430  | -4.402260  | 1.292955  |
| 176.H | -2.951378  | 0.877312   | -2.189400 |
| 177.H | -2.772020  | -1.245221  | 1.802565  |
| 178.H | -5.153719  | -1.115306  | 1.691649  |
| 179.H | -6.038238  | -2.634665  | 1.607514  |
| 180.P | -7.201906  | -8.105373  | -0.884986 |
| 181.O | -8.626302  | -8.804996  | -0.697613 |
| 182.O | -6.508561  | -8.293932  | -2.193317 |
| 183.N | -2.283477  | 2.819542   | 1.756769  |
| 184.O | -7.579106  | -6.563316  | -0.658707 |
| 185.C | -8.237861  | -6.086451  | 0.581714  |
| 186.C | -8.690577  | -4.647343  | 0.402447  |
| 187.O | -7.537609  | -3.752747  | 0.361709  |
| 188.C | -9.522419  | -4.344358  | -0.869442 |

|        |            |            |           |
|--------|------------|------------|-----------|
| 189.O  | -10.634239 | -3.468036  | -0.597456 |
| 190.C  | -8.499002  | -3.711902  | -1.850371 |
| 191.O  | -6.361574  | -8.546791  | 0.404953  |
| 192.C  | -10.670072 | 3.751083   | 1.977076  |
| 193.N  | -5.907244  | -0.494937  | -1.564533 |
| 194.C  | -9.413268  | 4.596730   | 1.801549  |
| 195.O  | -8.248461  | 3.852862   | 2.322106  |
| 196.C  | -3.967851  | -7.958065  | 0.007589  |
| 197.C  | -7.511212  | -3.002364  | -0.876613 |
| 198.N  | -6.134797  | -2.921605  | -1.316818 |
| 199.C  | -5.223294  | -3.974283  | -1.412135 |
| 200.C  | -9.064650  | 4.969294   | 0.344689  |
| 201.H  | -4.948311  | -9.920169  | -0.314602 |
| 202.O  | -8.551769  | 6.355996   | 0.396777  |
| 203.C  | -7.955618  | 3.964072   | 0.000868  |
| 204.C  | -7.199163  | 3.931044   | 1.337990  |
| 205.N  | -4.015225  | -3.554675  | -1.728422 |
| 206.C  | -2.911242  | 4.054739   | 1.731498  |
| 207.N  | -2.147227  | 5.163624   | 1.782198  |
| 208.N  | -4.242659  | 4.185851   | 1.670739  |
| 209.C  | -4.894574  | 3.015549   | 1.622160  |
| 210.H  | -10.796016 | 3.520649   | 3.041759  |
| 211.C  | -4.117095  | -2.169014  | -1.836469 |
| 212.C  | -4.605364  | -9.405315  | 1.816215  |
| 213.O  | -3.851104  | -8.244048  | 2.328826  |
| 214.N  | -6.267939  | 2.841331   | 1.499588  |
| 215.C  | -4.976257  | -9.062924  | 0.357109  |
| 216.H  | -11.531785 | 4.336172   | 1.641647  |
| 217.O  | 10.661549  | -2.537050  | 1.191554  |
| 218.H  | -9.529372  | 5.515425   | 2.387201  |
| 219.C  | 10.670072  | -3.751083  | 1.977076  |
| 220.C  | 9.413268   | -4.596730  | 1.801549  |
| 221.O  | 8.248461   | -3.852862  | 2.322106  |
| 222.H  | -9.918319  | 4.939571   | -0.331750 |
| 223.C  | 9.064650   | -4.969294  | 0.344689  |
| 224.H  | -8.455129  | 2.996765   | -0.152634 |
| 225.H  | -10.319646 | -2.685840  | -0.106597 |
| 226.O  | 8.551769   | -6.355996  | 0.396777  |
| 227.C  | 2.167875   | -4.114707  | -1.834650 |
| 228.C  | 1.191719   | -3.122227  | -2.097861 |
| 229.O  | 1.382512   | -1.902773  | -2.342019 |
| 230.N  | -0.119836  | -3.636407  | -2.026647 |
| 231.C  | -0.438238  | -4.967214  | -1.791915 |
| 232.N  | -1.740173  | -5.303833  | -1.816909 |
| 233.N  | 0.493749   | -5.904859  | -1.564551 |
| 234.C  | 1.750328   | -5.427157  | -1.577083 |
| 235.H  | 6.154596   | -7.496591  | 1.394995  |
| 236.H  | 6.724215   | -9.087680  | 0.794993  |
| 237.H  | 4.404278   | -9.275308  | 1.299668  |
| 238.H  | 5.246320   | -9.954049  | -1.295894 |
| 239.O  | 4.665676   | -7.879506  | -2.711706 |
| 240.H  | 2.976391   | -8.984789  | -2.487826 |
| 241.H  | 1.968620   | -7.835065  | -0.695355 |
| 242.H  | 4.994715   | -5.484019  | -1.183047 |
| 243.H  | -0.878485  | -2.949260  | -2.190280 |
| 244.H  | -2.508696  | -4.606662  | -1.813548 |
| 245.H  | -1.987356  | -6.252642  | -1.563918 |
| 246.O  | -3.470140  | 10.630487  | -0.588825 |
| 247.C  | -3.710607  | 8.496803   | -1.844754 |
| 248.C  | -2.999894  | 7.508390   | -0.872187 |
| 249.C  | 0.438238   | 4.967214   | -1.791915 |
| 250.H  | -6.724215  | 9.087680   | 0.794993  |
| 251.H  | -4.404278  | 9.275308   | 1.299668  |
| 252.H  | -2.686630  | 10.315988  | -0.100042 |
| 253.C  | -6.496925  | 1.463861   | 1.476526  |
| 254.H  | 8.589387   | 9.781008   | -0.645013 |
| 255.N  | -2.919925  | 6.132054   | -1.312861 |
| 256.H  | -7.510630  | -6.158517  | 1.393440  |
| 257.H  | -5.246320  | 9.954949   | -1.295894 |
| 258.H  | -1.923457  | -10.079519 | 1.636128  |
| 259.H  | 1.923457   | 10.079519  | 1.636128  |
| 260.H  | -9.774019  | 8.592272   | -0.666558 |
| 261.N  | 6.267939   | -2.841331  | 1.499588  |
| 262.C  | -1.463807  | -6.495476  | 1.479443  |
| 263.H  | 10.063792  | -1.907341  | 1.632800  |
| 264.H  | 9.774019   | -8.592272  | -0.666558 |
| 265.H  | 5.464596   | -7.666015  | -2.185129 |
| 266.H  | 7.671642   | 5.468175   | -2.189313 |
| 267.H  | -5.464596  | 7.666015   | -2.185129 |
| 268.H  | -7.671642  | -5.468175  | -2.189313 |
| 269.H  | -7.549109  | 4.812316   | -1.736557 |
| 270.H  | -4.811860  | -7.556823  | -1.732831 |
| 271.H  | 7.549109   | -4.812316  | -1.736557 |
| 272.H  | 4.811860   | 7.556823   | -1.732831 |
| 273.Cs | 0.000000   | 0.000000   | -0.277420 |

**Table S4.** Cartesian coordinates (in Å) and ADF total bonding energies (in kcal/mol) of guanosine dimer (guanosine monophosphate + guanosine), guanosine dimer counterion (Na<sup>+</sup>), and (H<sub>2</sub>CO)<sub>8</sub> at the COSMO ZORA-BLYP-D3(BJ)/TZ2P level of theory.

| Guanosine dimer (Bond Energy: -9837.28) (Symmetry C1) (imag freq -14cm <sup>-1</sup> ) |           |            |           |
|----------------------------------------------------------------------------------------|-----------|------------|-----------|
| 1.C                                                                                    | -8.916515 | -4.838006  | 0.112362  |
| 2.O                                                                                    | -2.875119 | -7.929217  | 2.536158  |
| 3.O                                                                                    | -9.816387 | -3.793548  | 0.542949  |
| 4.C                                                                                    | -7.946894 | -4.334398  | -0.985480 |
| 5.O                                                                                    | -5.567617 | -8.911222  | 1.342342  |
| 6.H                                                                                    | -6.914663 | -6.732824  | 2.310814  |
| 7.N                                                                                    | -5.297388 | -1.066928  | -0.476094 |
| 8.C                                                                                    | -4.165877 | -9.268526  | 1.019046  |
| 9.H                                                                                    | -5.681879 | -2.925349  | 2.521218  |
| 10.C                                                                                   | -3.446930 | -8.141477  | 0.261693  |
| 11.H                                                                                   | -0.701450 | -10.871150 | 1.502129  |
| 12.C                                                                                   | -6.859653 | -3.641241  | -0.122438 |
| 13.N                                                                                   | -5.553732 | -3.488924  | -0.724383 |
| 14.C                                                                                   | -4.704397 | -4.488070  | -1.208985 |
| 15.C                                                                                   | -1.016008 | -6.114579  | 0.651431  |
| 16.O                                                                                   | -1.402561 | -10.207283 | 1.374878  |
| 17.H                                                                                   | -4.163664 | -10.225851 | 0.498921  |
| 18.C                                                                                   | -3.650309 | -2.624601  | -1.472286 |
| 19.H                                                                                   | -7.793446 | -10.480585 | 1.167756  |
| 20.O                                                                                   | -7.247175 | -7.266754  | 0.308976  |
| 21.C                                                                                   | -7.705528 | -6.625730  | 1.565089  |

|      |            |            |           |
|------|------------|------------|-----------|
| 22.N | -3.567270  | -4.003503  | -1.668047 |
| 23.C | -3.269703  | -7.123744  | 1.400712  |
| 24.N | -0.450289  | -4.921893  | 0.601214  |
| 25.C | -1.403806  | -4.040475  | 1.120328  |
| 26.H | -7.198460  | -2.633002  | 0.141394  |
| 27.C | -2.711262  | -1.588032  | -1.759710 |
| 28.C | -1.389503  | -2.620364  | 1.289964  |
| 29.H | -1.794292  | -10.161546 | 3.440569  |
| 30.H | -2.784838  | -11.318189 | 2.509840  |
| 31.H | -4.144585  | -9.468907  | 3.171539  |
| 32.H | -2.466640  | -8.543511  | -0.024021 |
| 33.O | -4.107367  | -7.568043  | -0.859328 |
| 34.P | -6.744744  | -8.786579  | 0.262257  |
| 35.H | -4.219510  | -6.613005  | 1.597839  |
| 36.C | -7.988565  | -5.157339  | 1.309135  |
| 37.H | -4.002789  | 1.896796   | -0.376113 |
| 38.N | -3.198706  | -0.326665  | -1.319644 |
| 39.N | -4.851042  | -2.340426  | 2.590417  |
| 40.H | -5.541641  | 1.341935   | 0.177339  |
| 41.C | -4.419623  | -0.094635  | -0.720652 |
| 42.O | -7.456610  | -5.395029  | -1.813349 |
| 43.O | -1.594876  | -1.665201  | -2.306042 |
| 44.H | -8.427492  | -3.612311  | -1.648611 |
| 45.H | -0.563180  | -7.043805  | 0.333527  |
| 46.N | -2.306740  | -6.070079  | 1.181293  |
| 47.H | -4.950503  | -5.535750  | -1.145514 |
| 48.H | -8.612878  | -7.133766  | 1.898770  |
| 49.H | -9.475147  | -5.713983  | -0.231849 |
| 50.C | -3.424232  | -9.287000  | 2.367131  |
| 51.O | -6.732866  | -4.456718  | 1.068047  |
| 52.H | -8.446526  | -4.762499  | 2.224782  |
| 53.O | -0.481130  | -1.803778  | 1.047234  |
| 54.C | -3.724719  | -2.945173  | 2.119613  |
| 55.C | -2.318575  | -10.323335 | 2.489688  |
| 56.N | -2.638463  | -2.155503  | 1.800979  |
| 57.H | -2.582811  | 0.463133   | -1.502838 |
| 58.C | -4.871561  | -2.287657  | -0.872186 |
| 59.H | -10.448617 | -3.632895  | -0.182278 |
| 60.O | -7.978167  | -9.548571  | 0.934985  |
| 61.O | -6.364294  | -9.176867  | -1.128360 |
| 62.N | -3.705319  | -4.264762  | 1.997332  |
| 63.C | -2.555875  | -4.742017  | 1.489214  |
| 64.N | -4.726252  | 1.188732   | -0.404105 |
| 65.H | -2.692713  | -1.151531  | 1.960497  |
| 66.H | -5.000257  | -1.363239  | 2.370199  |
| 67.H | -7.281714  | -6.174248  | -1.243344 |
| 68.H | -4.739668  | -8.224349  | -1.233415 |

| Counterion Guanosine dimer (Bond Energy: -9834.18) (Symmetry C1) |            |           |           |
|------------------------------------------------------------------|------------|-----------|-----------|
| 1.C                                                              | -8.922753  | -5.425376 | 0.160584  |
| 2.O                                                              | -2.929522  | -6.687472 | 3.003056  |
| 3.O                                                              | -9.829814  | -4.310604 | 0.312682  |
| 4.C                                                              | -7.981277  | -5.239977 | -1.052740 |
| 5.O                                                              | -5.318389  | -8.519769 | 2.435453  |
| 6.H                                                              | -6.932808  | -6.637742 | 2.802509  |
| 7.N                                                              | -5.578187  | -1.766500 | -1.348059 |
| 8.C                                                              | -3.890648  | -8.733590 | 2.202926  |
| 9.H                                                              | -5.484746  | -1.885886 | 2.136557  |
| 10.C                                                             | -3.342015  | -7.911734 | 1.021757  |
| 11.H                                                             | -0.167867  | -9.326224 | 3.088289  |
| 12.C                                                             | -6.906709  | -4.317423 | -0.426903 |
| 13.N                                                             | -5.652660  | -4.204123 | -1.135869 |
| 14.C                                                             | -4.779844  | -5.218071 | -1.540820 |
| 15.C                                                             | -1.252333  | -5.765824 | 0.334375  |
| 16.O                                                             | -0.977975  | -8.910267 | 2.743243  |
| 17.H                                                             | -3.691995  | -9.802729 | 2.105866  |
| 18.C                                                             | -3.913841  | -3.368212 | -2.236968 |
| 19.H                                                             | -4.706363  | -8.706644 | -0.181165 |
| 20.O                                                             | -7.249524  | -7.706292 | 1.027836  |
| 21.C                                                             | -7.705999  | -6.744429 | 2.036879  |
| 22.N                                                             | -3.738697  | -4.751523 | -2.203746 |
| 23.C                                                             | -3.351637  | -6.494518 | 1.628787  |
| 24.N                                                             | -0.688410  | -4.650103 | -0.089490 |
| 25.C                                                             | -1.556585  | -3.631517 | 0.305862  |
| 26.H                                                             | -7.307873  | -3.299373 | -0.351525 |
| 27.C                                                             | -3.104847  | -2.343314 | -2.814472 |
| 28.C                                                             | -1.477153  | -2.215768 | 0.129454  |
| 29.H                                                             | -1.435743  | -8.133432 | 4.641434  |
| 30.H                                                             | -2.147645  | -9.730512 | 4.288428  |
| 31.H                                                             | -3.861226  | -8.072492 | 4.258433  |
| 32.H                                                             | -2.300610  | -8.234983 | 0.907229  |
| 33.O                                                             | -4.010355  | -7.995357 | -0.229177 |
| 34.P                                                             | -6.525117  | -9.091746 | 1.504813  |
| 35.H                                                             | -4.356607  | -6.058528 | 1.593659  |
| 36.C                                                             | -7.954872  | -5.404519 | 1.372316  |
| 37.H                                                             | -4.700488  | 1.226058  | -2.173076 |
| 38.N                                                             | -3.644856  | -1.056878 | -2.537476 |
| 39.N                                                             | -4.631969  | -1.402202 | 1.874963  |
| 40.H                                                             | -6.061621  | 0.685199  | -1.277198 |
| 41.C                                                             | -4.806148  | -0.801214 | -1.838981 |
| 42.O                                                             | -7.463998  | -6.492335 | -1.519473 |
| 43.O                                                             | -2.055439  | -2.446803 | -3.476951 |
| 44.H                                                             | -8.480324  | -4.758220 | -1.896030 |
| 45.H                                                             | -0.851005  | -6.760557 | 0.203523  |
| 46.N                                                             | -2.464272  | -5.541078 | 0.988653  |
| 47.H                                                             | -4.937556  | -6.249859 | -1.269818 |
| 48.H                                                             | -8.629756  | -7.113529 | 2.493617  |
| 49.C                                                             | -9.477302  | -6.366028 | 0.084006  |
| 50.C                                                             | -3.178471  | -8.084695 | 3.402494  |
| 51.O                                                             | -6.681532  | -4.872034 | 0.889430  |
| 52.H                                                             | -8.362148  | -4.727035 | 2.134477  |
| 53.O                                                             | -0.589769  | -1.535291 | -0.417618 |
| 54.C                                                             | -3.655016  | -2.195238 | 1.349300  |
| 55.C                                                             | -1.890018  | -8.753021 | 3.856910  |
| 56.N                                                             | -2.621830  | -1.572109 | 0.679678  |
| 57.H                                                             | -3.105572  | -0.273617 | -2.901155 |
| 58.C                                                             | -5.089935  | -3.008677 | -1.564872 |
| 59.H                                                             | -10.487465 | -4.366497 | -0.405512 |
| 60.O                                                             | -7.456205  | -9.932301 | 2.352424  |
| 61.O                                                             | -5.990986  | -9.759690 | 0.242312  |
| 62.N                                                             | -3.706939  | -3.509674 | 1.524451  |
| 63.C                                                             | -2.659534  | -4.166689 | 0.983714  |
| 64.N                                                             | -5.116839  | 0.502806  | -1.597544 |
| 65.H                                                             | -2.616173  | -0.555987 | 0.615101  |
| 66.H                                                             | -4.768391  | -0.475296 | 1.486830  |

|       |           |            |           |
|-------|-----------|------------|-----------|
| 67.H  | -7.250207 | -7.044295  | -0.732128 |
| 68.Na | -7.258151 | -11.763893 | 0.784607  |

| (H <sub>2</sub> CO) <sub>8</sub> (Bond Energy: -3976.89) (Symmetry C <sub>2</sub> ) |           |           |           |
|-------------------------------------------------------------------------------------|-----------|-----------|-----------|
| 1.O                                                                                 | 2.351634  | 0.139469  | -2.327449 |
| 2.O                                                                                 | 0.140701  | -2.345611 | -2.301209 |
| 3.C                                                                                 | -1.586184 | 2.927653  | 1.614022  |
| 4.C                                                                                 | -2.923026 | -1.584300 | 1.612431  |
| 5.O                                                                                 | -1.677766 | -1.639309 | 1.683388  |
| 6.C                                                                                 | -0.690750 | -3.243043 | -2.044596 |
| 7.C                                                                                 | 1.586184  | -2.927653 | 1.614022  |
| 8.C                                                                                 | 2.923026  | 1.584300  | 1.612431  |
| 9.C                                                                                 | -3.247179 | 0.691344  | -2.060590 |
| 10.O                                                                                | 1.641432  | -1.682350 | 1.688147  |
| 11.O                                                                                | 1.677766  | 1.639309  | 1.683388  |
| 12.O                                                                                | -2.351634 | -0.139469 | -2.327449 |
| 13.C                                                                                | 0.690750  | 3.243043  | -2.044596 |
| 14.C                                                                                | 3.247179  | -0.691344 | -2.060590 |
| 15.O                                                                                | -1.641432 | 1.682350  | 1.688147  |
| 16.O                                                                                | -0.140701 | 2.345611  | -2.301209 |
| 17.H                                                                                | -2.502335 | 3.546214  | 1.579509  |
| 18.H                                                                                | -0.610461 | 3.446785  | 1.584426  |
| 19.H                                                                                | -3.541758 | -2.500520 | 1.579396  |
| 20.H                                                                                | -3.443283 | -0.609118 | 1.584085  |
| 21.H                                                                                | -1.775654 | -3.040904 | -2.104776 |
| 22.H                                                                                | -0.369084 | -4.262320 | -1.762705 |
| 23.H                                                                                | 0.610461  | -3.446785 | 1.584426  |
| 24.H                                                                                | 2.502335  | -3.546214 | 1.579509  |
| 25.H                                                                                | 3.443283  | 0.609118  | 1.584085  |
| 26.H                                                                                | 3.541758  | 2.500520  | 1.579396  |
| 27.H                                                                                | -4.318410 | 0.431851  | -2.150201 |
| 28.H                                                                                | -2.985198 | 1.715877  | -1.740484 |
| 29.H                                                                                | 0.369084  | 4.262320  | -1.762705 |
| 30.H                                                                                | 1.775654  | 3.040904  | -2.104776 |
| 31.H                                                                                | 2.985198  | -1.715877 | -1.740484 |
| 32.H                                                                                | 4.318410  | -0.431851 | -2.150201 |

**Table S4.** Cartesian coordinates (in Å) and ADF total bonding energies (in kcal/mol) of RNA GQ<sub>4</sub>Na<sup>+</sup> at the COSMO ZORA-BLYP-

D3(BJ)/TZ2P level of theory.

| RNA GQ <sub>4</sub> Na <sup>+</sup> (Bond Energy: -39429.48) (Symmetry C <sub>2</sub> ) |            |           |           |
|-----------------------------------------------------------------------------------------|------------|-----------|-----------|
| 1.C                                                                                     | 1.788047   | 6.331377  | 1.948624  |
| 2.N                                                                                     | 1.048514   | 5.252458  | 2.108210  |
| 3.C                                                                                     | 1.943929   | 4.185411  | 2.170353  |
| 4.C                                                                                     | 1.725679   | 2.779987  | 2.227198  |
| 5.O                                                                                     | 0.629024   | 2.167665  | 2.248206  |
| 6.N                                                                                     | 2.934404   | 2.058676  | 2.237470  |
| 7.C                                                                                     | 4.195882   | 2.623652  | 2.196967  |
| 8.N                                                                                     | 5.259697   | 1.799351  | 2.265104  |
| 9.N                                                                                     | 4.396688   | 3.945516  | 2.111026  |
| 10.C                                                                                    | 3.259044   | 4.655016  | 2.072998  |
| 11.H                                                                                    | 4.990695   | 10.055431 | 3.946732  |
| 12.H                                                                                    | 5.457710   | 10.994146 | 2.507951  |
| 13.H                                                                                    | 6.435528   | 8.745937  | 2.454471  |
| 14.H                                                                                    | 5.127856   | 9.809512  | 0.205298  |
| 15.H                                                                                    | 3.121864   | 8.517742  | 0.725935  |
| 16.O                                                                                    | 3.814682   | 7.306412  | -0.805629 |
| 17.H                                                                                    | 5.089237   | 6.233241  | 1.314641  |
| 18.H                                                                                    | 1.416535   | 7.341667  | 1.851772  |
| 19.H                                                                                    | 2.822593   | 1.023563  | 2.246583  |
| 20.H                                                                                    | 5.187446   | 0.769369  | 2.160128  |
| 21.H                                                                                    | 6.161828   | 2.228864  | 2.097922  |
| 22.P                                                                                    | 6.932154   | 8.360240  | -1.393948 |
| 23.O                                                                                    | 7.865266   | 9.546738  | -1.513417 |
| 24.O                                                                                    | 5.748328   | 8.369406  | -2.357634 |
| 25.O                                                                                    | 7.700242   | 6.941718  | -1.615186 |
| 26.C                                                                                    | 8.808617   | 6.531178  | -0.745966 |
| 27.C                                                                                    | 1.267437   | -3.014555 | -0.926512 |
| 28.C                                                                                    | 9.033980   | 5.037061  | -0.905650 |
| 29.O                                                                                    | 7.872730   | 4.318816  | -0.377210 |
| 30.C                                                                                    | 9.241279   | 4.536375  | -2.361846 |
| 31.O                                                                                    | 10.337701  | 3.605741  | -2.476034 |
| 32.C                                                                                    | 7.877713   | 3.899948  | -2.730775 |
| 33.C                                                                                    | 7.415997   | 3.355208  | -1.349632 |
| 34.C                                                                                    | -1.943929  | -4.185411 | 2.170353  |
| 35.N                                                                                    | 5.987843   | 3.184376  | -1.189572 |
| 36.C                                                                                    | -1.725679  | -2.779987 | 2.227198  |
| 37.H                                                                                    | -2.326055  | -4.699268 | -1.053032 |
| 38.N                                                                                    | -0.004846  | -3.610689 | -0.926536 |
| 39.N                                                                                    | 1.804726   | -5.262827 | 2.228647  |
| 40.H                                                                                    | -1.743477  | -6.345544 | -1.187132 |
| 41.C                                                                                    | -0.249667  | -4.966576 | -1.091760 |
| 42.O                                                                                    | 4.780960   | -7.006350 | -3.409820 |
| 43.O                                                                                    | 1.381954   | -1.769641 | -0.782702 |
| 44.H                                                                                    | 3.015792   | -8.025795 | -3.496926 |
| 45.C                                                                                    | 4.002836   | 7.917196  | 0.461313  |
| 46.N                                                                                    | 6.025464   | -3.149695 | 1.775315  |
| 47.H                                                                                    | 5.232459   | -5.285286 | -1.244011 |
| 48.H                                                                                    | 7.070424   | -9.748106 | -1.193985 |
| 49.H                                                                                    | 5.283093   | -9.518071 | -3.153276 |
| 50.O                                                                                    | -3.814682  | -7.306412 | -0.805629 |
| 51.C                                                                                    | 5.021945   | 4.186578  | -1.100389 |
| 52.N                                                                                    | 3.805121   | 3.695532  | -1.009981 |
| 53.O                                                                                    | 2.167178   | -0.632536 | 2.216829  |
| 54.C                                                                                    | 2.625229   | -4.198842 | 2.141583  |
| 55.C                                                                                    | 10.111561  | -4.928417 | 2.717867  |
| 56.N                                                                                    | 2.060706   | -2.937653 | 2.202696  |
| 57.C                                                                                    | 4.258688   | 6.894830  | 1.585714  |
| 58.C                                                                                    | 1.966501   | -5.330543 | -1.172134 |
| 59.O                                                                                    | -0.629024  | -2.167665 | 2.248206  |
| 60.H                                                                                    | -2.934533  | -9.765738 | 2.966829  |
| 61.N                                                                                    | -1.048514  | -5.252458 | 2.108210  |
| 62.N                                                                                    | 3.944491   | -4.397796 | 2.016612  |
| 63.C                                                                                    | 4.651262   | -3.259100 | 1.967271  |
| 64.N                                                                                    | -1.529100  | -5.355141 | -1.170609 |
| 65.O                                                                                    | -10.425873 | 3.548981  | 2.416404  |

|        |            |            |           |
|--------|------------|------------|-----------|
| 66.C   | -10.111561 | 4.928417   | 2.717867  |
| 67.C   | -8.837280  | 5.417513   | 2.039572  |
| 68.0   | -7.693896  | 4.647774   | 2.566177  |
| 69.C   | -8.791026  | 5.252326   | 0.503585  |
| 70.0   | -8.095984  | 6.422948   | -0.028971 |
| 71.C   | -7.910659  | 4.001746   | 0.320883  |
| 72.C   | -6.877035  | 4.260328   | 1.434934  |
| 73.N   | -6.025464  | 3.149695   | 1.775315  |
| 74.C   | -6.324985  | 1.787503   | 1.816323  |
| 75.N   | -5.249944  | 1.048743   | 2.003920  |
| 76.C   | -4.184135  | 1.944699   | 2.084504  |
| 77.C   | -2.780528  | 1.728256   | 2.177563  |
| 78.0   | -2.167178  | 0.632536   | 2.216829  |
| 79.N   | -2.060706  | 2.937653   | 2.202696  |
| 80.C   | -2.625229  | 4.198842   | 2.141583  |
| 81.N   | -1.804726  | 5.262827   | 2.228647  |
| 82.N   | -3.944491  | 4.397796   | 2.016612  |
| 83.C   | -4.651262  | 3.259100   | 1.967271  |
| 84.H   | -10.016164 | 5.073134   | 3.801575  |
| 85.H   | -10.954766 | 5.525983   | 2.358269  |
| 86.H   | -8.692788  | 6.476317   | 2.284457  |
| 87.H   | -9.782942  | 5.160276   | 0.056266  |
| 88.H   | -8.523448  | 3.134831   | 0.602639  |
| 89.0   | -7.315585  | 3.782899   | -0.948759 |
| 90.H   | -6.207814  | 5.079000   | 1.147313  |
| 91.H   | -7.333018  | 1.415657   | 1.700056  |
| 92.H   | -1.026167  | 2.826544   | 2.240907  |
| 93.H   | -0.770646  | 5.191221   | 2.178895  |
| 94.H   | -2.228493  | 6.165620   | 2.051963  |
| 95.P   | -8.324444  | 6.927218   | -1.561283 |
| 96.0   | -9.541807  | 7.819963   | -1.678221 |
| 97.0   | -8.295537  | 5.745167   | -2.527105 |
| 98.0   | -6.930329  | 7.738720   | -1.779449 |
| 99.C   | -6.537994  | 8.840781   | -0.892905 |
| 100.C  | -5.037810  | 9.054881   | -1.005588 |
| 101.0  | -4.344934  | 7.883753   | -0.465043 |
| 102.C  | -4.490985  | 9.270325   | -2.444279 |
| 103.0  | -3.553608  | 10.364113  | -2.521871 |
| 104.C  | -3.849220  | 7.906562   | -2.802300 |
| 105.C  | -3.349141  | 7.434275   | -1.408338 |
| 106.N  | -3.181185  | 6.005370   | -1.253018 |
| 107.C  | -4.183225  | 5.036138   | -1.220923 |
| 108.N  | -3.689347  | 3.819569   | -1.115242 |
| 109.C  | -2.305728  | 3.972433   | -1.081652 |
| 110.C  | -1.267437  | 3.014555   | -0.926512 |
| 111.0  | -1.381954  | 1.769641   | -0.782702 |
| 112.N  | 0.004846   | 3.610689   | -0.926536 |
| 113.C  | 0.249667   | 4.966576   | -1.091760 |
| 114.N  | 1.529100   | 5.355141   | -1.170609 |
| 115.N  | -0.737268  | 5.873817   | -1.189318 |
| 116.C  | -1.966501  | 5.330543   | -1.172134 |
| 117.H  | -6.797595  | 8.580244   | 0.135939  |
| 118.H  | -7.070424  | 9.748106   | -1.193985 |
| 119.H  | -4.788121  | 9.928179   | -0.390219 |
| 120.H  | -5.283093  | 9.518071   | -3.153276 |
| 121.0  | -4.780960  | 7.006350   | -3.409820 |
| 122.H  | -3.015792  | 8.025795   | -3.496926 |
| 123.H  | -2.372301  | 7.886661   | -1.192625 |
| 124.H  | -5.232459  | 5.285286   | -1.244011 |
| 125.H  | 0.794108   | 2.941037   | -0.840968 |
| 126.H  | 2.326055   | 4.699268   | -1.053032 |
| 127.H  | 1.743477   | 6.345544   | -1.187132 |
| 128.0  | -6.969575  | -4.844877  | -3.304895 |
| 129.H  | -7.996399  | -3.087992  | -3.450453 |
| 130.0  | 10.425873  | -3.548981  | 2.416404  |
| 131.H  | -7.869042  | -2.371577  | -1.168796 |
| 132.H  | -5.272453  | -5.235766  | -1.094590 |
| 133.H  | -2.921812  | 0.799451   | -0.894496 |
| 134.H  | -4.678617  | 2.324706   | -1.164730 |
| 135.H  | -6.320354  | 1.736771   | -1.298862 |
| 136.H  | -5.089237  | -6.233241  | 1.314641  |
| 137.H  | -1.416535  | -7.341667  | 1.851772  |
| 138.H  | 10.233309  | 2.897369   | -1.813592 |
| 139.H  | -2.822593  | -1.023563  | 2.246583  |
| 140.C  | -5.021945  | -4.186578  | -1.109389 |
| 141.N  | -3.805121  | -3.691532  | -1.009981 |
| 142.C  | -3.954416  | -2.307191  | -1.031644 |
| 143.C  | -2.996403  | -1.265196  | -0.903484 |
| 144.0  | -1.753704  | -1.377077  | -0.736078 |
| 145.N  | -5.329457  | 1.523837   | -1.281415 |
| 146.N  | -5.851406  | -0.740660  | -1.219333 |
| 147.C  | -5.310809  | -1.969160  | -1.149464 |
| 148.H  | -8.548815  | -6.756467  | 0.291401  |
| 149.H  | -5.187446  | -0.769369  | 2.160128  |
| 150.H  | -2.868785  | 10.256133  | -1.835580 |
| 151.H  | -6.161828  | -2.228864  | 2.097922  |
| 152.P  | -6.932154  | -8.360240  | -1.393948 |
| 153.0  | -7.865266  | -9.546738  | -1.513417 |
| 154.0  | -5.748328  | -8.369406  | -2.357634 |
| 155.0  | -7.700242  | -6.941718  | -1.615186 |
| 156.C  | -8.808617  | -6.531178  | -0.745966 |
| 157.N  | -3.589944  | 0.006772   | -0.962919 |
| 158.Na | -10.390111 | 6.456254   | -3.486435 |
| 159.C  | -9.033980  | -5.037061  | -0.905650 |
| 160.0  | -7.872730  | -4.318816  | -0.377210 |
| 161.C  | -9.241279  | -4.536375  | -2.361846 |
| 162.C  | 6.877035   | -4.260328  | 1.434934  |
| 163.N  | 5.249944   | -1.048743  | 2.003920  |
| 164.C  | 4.184135   | -1.944699  | 2.084504  |
| 165.H  | 2.372301   | -7.886661  | -1.192625 |
| 166.C  | 2.780528   | -1.728256  | 2.177563  |
| 167.H  | 10.016164  | -5.073134  | 3.801575  |
| 168.H  | 10.954766  | -5.525983  | 2.358269  |
| 169.H  | 8.692788   | -6.476317  | 2.284457  |
| 170.H  | 8.523448   | -3.134831  | 0.602639  |
| 171.0  | 7.315585   | -3.782899  | -0.948759 |
| 172.H  | 6.207814   | -5.079000  | 1.147313  |
| 173.H  | 7.333018   | -1.415657  | 1.700056  |
| 174.0  | -3.485784  | -10.443533 | 2.534379  |
| 175.H  | 4.788121   | -9.928179  | -0.390219 |
| 176.H  | -0.794108  | -2.941037  | -0.840968 |
| 177.H  | 1.026167   | -2.826544  | 2.240907  |
| 178.H  | 0.770646   | -5.191221  | 2.178895  |
| 179.H  | 2.228493   | -6.165620  | 2.051963  |
| 180.P  | 8.324444   | -6.927218  | -1.561283 |
| 181.0  | 9.541807   | -7.819963  | -1.678221 |
| 182.0  | 8.295537   | -5.745167  | -2.527105 |
| 183.N  | -2.934404  | -2.058676  | 2.237470  |
| 184.0  | 6.930329   | -7.738720  | -1.779449 |

|        |            |            |           |
|--------|------------|------------|-----------|
| 185.C  | 6.537994   | -8.840781  | -0.892905 |
| 186.C  | 5.037810   | -9.054881  | -1.005588 |
| 187.0  | 4.344934   | -7.883753  | -0.465043 |
| 188.C  | 4.490985   | -9.270325  | -2.444279 |
| 189.0  | 3.553608   | -10.364113 | -2.521871 |
| 190.C  | 3.849220   | -7.906562  | -2.802300 |
| 191.0  | 8.095984   | -6.422948  | -0.028971 |
| 192.C  | -4.863418  | -10.145661 | 2.860384  |
| 193.N  | 0.737268   | -5.873817  | -1.189318 |
| 194.C  | -5.378369  | -8.875137  | 2.194599  |
| 195.0  | -4.617177  | -7.723544  | 2.716844  |
| 196.C  | 7.910659   | -4.001746  | 0.320883  |
| 197.C  | 3.349141   | -7.434275  | -1.408338 |
| 198.N  | 3.181185   | -6.005370  | -1.253018 |
| 199.C  | 4.183225   | -5.036138  | -1.220923 |
| 200.C  | -5.234506  | -8.820937  | 0.656410  |
| 201.H  | 9.782942   | -5.160276  | 0.056266  |
| 202.0  | -6.426830  | -8.150549  | 0.141029  |
| 203.C  | -4.002836  | -7.917196  | 0.461313  |
| 204.C  | -4.258688  | -6.894830  | 1.585714  |
| 205.N  | 3.689347   | -3.819569  | -1.115242 |
| 206.C  | -4.195882  | -2.623652  | 2.196967  |
| 207.N  | -5.259697  | -1.799351  | 2.265104  |
| 208.N  | -4.396688  | -3.945516  | 2.111026  |
| 209.C  | -3.259044  | -4.655016  | 2.072998  |
| 210.H  | -4.990695  | -10.055431 | 3.946732  |
| 211.C  | 2.305728   | -3.972433  | -1.081652 |
| 212.C  | 8.837280   | -5.417513  | 2.039572  |
| 213.0  | 7.693896   | -4.647774  | 2.566177  |
| 214.N  | -3.150586  | -6.033364  | 1.911476  |
| 215.C  | 8.791026   | -5.252326  | 0.503585  |
| 216.H  | -5.457710  | -10.994146 | 2.507951  |
| 217.0  | 3.485784   | 10.443533  | 2.534379  |
| 218.H  | -6.435528  | -8.745937  | 2.454471  |
| 219.C  | 4.863418   | 10.145661  | 2.860384  |
| 220.C  | 5.378369   | 8.875137   | 2.194599  |
| 221.0  | 4.617177   | 7.723544   | 2.716844  |
| 222.H  | -5.127856  | -9.809512  | 0.205298  |
| 223.C  | 5.234506   | 8.820937   | 0.656410  |
| 224.H  | -3.121864  | -8.517742  | 0.725935  |
| 225.H  | 2.868785   | -10.256133 | -1.835580 |
| 226.0  | 6.426830   | 8.150549   | 0.141029  |
| 227.C  | 3.954416   | 2.307191   | -1.031644 |
| 228.C  | 2.996403   | 1.265196   | -0.903484 |
| 229.0  | 1.753704   | 1.377077   | -0.736878 |
| 230.N  | 3.589944   | -0.006772  | -0.962919 |
| 231.C  | 4.943246   | -0.247290  | -1.149622 |
| 232.N  | 5.329457   | -1.523837  | -1.281415 |
| 233.N  | 5.851406   | 0.740660   | -1.219333 |
| 234.C  | 5.310809   | 1.969160   | -1.149464 |
| 235.H  | 8.548815   | 6.756467   | 0.291401  |
| 236.H  | 9.710893   | 7.080002   | -1.032482 |
| 237.H  | 9.913644   | 4.775741   | -0.304332 |
| 238.H  | 9.481113   | 5.351321   | -3.047241 |
| 239.0  | 6.969575   | 4.844877   | -3.304895 |
| 240.H  | 7.996399   | 3.087992   | -3.450453 |
| 241.H  | 7.869042   | 2.371577   | -1.168796 |
| 242.H  | 5.272453   | 5.235766   | -1.094590 |
| 243.H  | 2.921812   | -0.799451  | -0.894496 |
| 244.H  | 4.678617   | -2.324706  | -1.164730 |
| 245.H  | 6.320354   | -1.736771  | -1.298862 |
| 246.0  | -10.337701 | -3.605741  | -2.476034 |
| 247.C  | -7.877713  | -3.899948  | -2.730775 |
| 248.C  | -7.415997  | -3.355208  | -1.349632 |
| 249.C  | -4.943246  | 0.247290   | -1.149622 |
| 250.H  | -9.710893  | -7.080002  | -1.032482 |
| 251.H  | -9.913644  | -4.775741  | -0.304332 |
| 252.H  | -10.233309 | -2.897369  | -1.813592 |
| 253.C  | -1.788047  | -6.331377  | 1.948624  |
| 254.H  | -7.676118  | 4.441191   | -1.606279 |
| 255.N  | -5.987843  | -3.184376  | -1.189572 |
| 256.H  | 6.797595   | -8.580244  | 0.135939  |
| 257.H  | -9.481113  | -5.351321  | -3.047241 |
| 258.H  | 9.748600   | -2.998085  | 2.850293  |
| 259.H  | -9.748600  | 2.998085   | 2.850293  |
| 260.Na | -6.543673  | -10.422865 | -3.340250 |
| 261.N  | 3.150586   | 6.033364   | 1.911476  |
| 262.C  | 6.324985   | -1.787503  | 1.816323  |
| 263.H  | 2.934533   | 9.765738   | 2.966029  |
| 264.Na | 10.390111  | -6.456254  | -3.486435 |
| 265.H  | 7.059147   | 5.690949   | -2.809298 |
| 266.H  | -5.641080  | 7.096870   | -2.939356 |
| 267.H  | -7.059147  | -5.690949  | -2.809298 |
| 268.H  | 5.641080   | -7.096870  | -2.939356 |
| 269.H  | -4.452661  | -7.702310  | -1.462923 |
| 270.H  | 7.676118   | -4.441191  | -1.606279 |
| 271.H  | 4.452661   | 7.702310   | -1.462923 |
| 272.Na | 6.543673   | 10.422865  | -3.340250 |
| 273.Na | 0.000000   | 0.000000   | 0.508428  |

| RNA GQ <sub>4Na</sub> -K <sup>+</sup> (Bond Energy: -39432.58) (Symmetry C2) |          |           |           |
|------------------------------------------------------------------------------|----------|-----------|-----------|
| 1.C                                                                          | 1.802532 | 6.359649  | 1.889606  |
| 2.N                                                                          | 1.064482 | 5.292694  | 2.120980  |
| 3.C                                                                          | 1.958936 | 4.224410  | 2.184866  |
| 4.C                                                                          | 1.738847 | 2.828415  | 2.334268  |
| 5.0                                                                          | 0.641516 | 2.227204  | 2.453703  |
| 6.N                                                                          | 2.942367 | 2.096739  | 2.316255  |
| 7.C                                                                          | 4.204466 | 2.649713  | 2.186366  |
| 8.N                                                                          | 5.264405 | 1.820587  | 2.240809  |
| 9.N                                                                          | 4.406078 | 3.964749  | 2.028381  |
| 10.C                                                                         | 3.271029 | 4.680012  | 2.009867  |
| 11.H                                                                         | 5.185496 | 10.009196 | 3.796973  |
| 12.H                                                                         | 5.606542 | 10.953847 | 2.348428  |
| 13.H                                                                         | 6.525592 | 8.685370  | 2.224219  |
| 14.H                                                                         | 5.153865 | 9.805034  | 0.047122  |
| 15.H                                                                         | 3.129526 | 8.565115  | 0.660020  |
| 16.0                                                                         | 3.700055 | 7.375525  | -0.930897 |
| 17.H                                                                         | 5.068802 | 6.224743  | 1.110734  |
| 18.H                                                                         | 1.432583 | 7.367994  | 1.769278  |
| 19.H                                                                         | 2.836743 | 1.066338  | 2.398500  |
| 20.H                                                                         | 5.188863 | 0.787230  | 2.217154  |
| 21.H                                                                         | 6.163171 | 2.23204   | 2.022378  |
| 22.P                                                                         | 6.857375 | 8.349883  | -1.626826 |
| 23.0                                                                         | 7.687387 | 9.608549  | -1.759749 |

|       |            |           |           |
|-------|------------|-----------|-----------|
| 24.0  | 5.662946   | 8.261050  | -2.573853 |
| 25.0  | 7.728253   | 6.993845  | -1.853524 |
| 26.0  | 8.842267   | 6.636702  | -0.966979 |
| 27.0  | 1.353022   | -3.022082 | -0.950589 |
| 28.0  | 9.065911   | 5.135266  | -1.036834 |
| 29.0  | 7.899429   | 4.451508  | -0.474135 |
| 30.0  | 9.280803   | 4.549687  | -2.460121 |
| 31.0  | 10.379837  | 3.616870  | -2.514563 |
| 32.0  | 7.920217   | 3.889943  | -2.796861 |
| 33.0  | 7.451568   | 3.428811  | -1.388865 |
| 34.0  | -1.958936  | -4.224410 | 2.184866  |
| 35.0  | 6.022115   | 3.262503  | -1.228984 |
| 36.0  | -1.738847  | -2.828415 | 2.334268  |
| 37.0  | -2.254289  | -4.713748 | -1.118712 |
| 38.0  | 0.077080   | -3.615439 | -0.962369 |
| 39.0  | 1.814962   | -5.260692 | 2.231909  |
| 40.0  | -1.662325  | -6.350574 | -1.232660 |
| 41.0  | -0.167840  | -4.971806 | -1.118816 |
| 42.0  | 4.848512   | -6.973784 | -3.422048 |
| 43.0  | 1.468626   | -1.776688 | -0.821853 |
| 44.0  | 3.092051   | -8.007560 | -3.507547 |
| 45.0  | 3.977630   | 7.946437  | 0.338133  |
| 46.0  | 6.048726   | -3.155929 | 1.836845  |
| 47.0  | 5.316781   | -5.294044 | -1.219413 |
| 48.0  | 7.178376   | -9.726574 | -1.261760 |
| 49.0  | 5.376811   | -9.482619 | -3.202681 |
| 50.0  | -3.700055  | -7.375525 | -0.930897 |
| 51.0  | 5.051337   | 4.264935  | -1.210677 |
| 52.0  | 3.832606   | 3.772842  | -1.117882 |
| 53.0  | 2.219582   | -0.638060 | 2.468856  |
| 54.0  | 2.644570   | -4.200125 | 2.191557  |
| 55.0  | 10.109800  | -4.987861 | 2.783669  |
| 56.0  | 2.090647   | -2.938864 | 2.323627  |
| 57.0  | 4.265740   | 6.897639  | 1.431461  |
| 58.0  | 2.050641   | -5.339647 | -1.169391 |
| 59.0  | -0.641516  | -2.227204 | 2.453703  |
| 60.0  | -3.077607  | -9.782993 | 2.914563  |
| 61.0  | -1.064482  | -5.292694 | 2.120980  |
| 62.0  | 3.960693   | -4.401331 | 2.043799  |
| 63.0  | 4.675861   | -3.266172 | 2.034136  |
| 64.0  | -1.448501  | -5.360063 | -1.206267 |
| 65.0  | -10.440010 | 3.603142  | 2.526526  |
| 66.0  | -10.109800 | 4.987861  | 2.783669  |
| 67.0  | -8.841980  | 5.447769  | 2.073670  |
| 68.0  | -7.694912  | 4.687012  | 2.604694  |
| 69.0  | -8.818358  | 5.238780  | 0.542800  |
| 70.0  | -8.117794  | 6.386351  | -0.031150 |
| 71.0  | -7.951355  | 3.975773  | 0.393571  |
| 72.0  | -6.897912  | 4.260745  | 1.472730  |
| 73.0  | -6.048726  | 3.155929  | 1.836845  |
| 74.0  | -6.356204  | 1.797650  | 1.928307  |
| 75.0  | -5.287926  | 1.060152  | 2.155846  |
| 76.0  | -4.219069  | 1.954595  | 2.210528  |
| 77.0  | -2.821807  | 1.734971  | 2.350811  |
| 78.0  | -2.219582  | 0.638060  | 2.468856  |
| 79.0  | -2.090647  | 2.938864  | 2.323627  |
| 80.0  | -2.644570  | 4.200125  | 2.191557  |
| 81.0  | -1.814962  | 5.260692  | 2.231909  |
| 82.0  | -3.960693  | 4.401331  | 2.043799  |
| 83.0  | -4.675861  | 3.266172  | 2.034136  |
| 84.0  | -9.997506  | 5.162721  | 3.861213  |
| 85.0  | -10.953128 | 5.582383  | 2.419219  |
| 86.0  | -8.687910  | 6.512271  | 2.285987  |
| 87.0  | -9.817015  | 5.144611  | 0.110960  |
| 88.0  | -8.565872  | 3.123352  | 0.702514  |
| 89.0  | -7.382924  | 3.710219  | -0.889453 |
| 90.0  | -6.227733  | 5.065890  | 1.151434  |
| 91.0  | -7.365137  | 1.427235  | 1.814891  |
| 92.0  | -1.059255  | 2.833823  | 2.396071  |
| 93.0  | -0.782016  | 5.185759  | 2.195489  |
| 94.0  | -2.230151  | 6.157530  | 2.010160  |
| 95.0  | -8.380428  | 6.859783  | -1.567421 |
| 96.0  | -9.627793  | 7.710292  | -1.685058 |
| 97.0  | -8.323891  | 5.663102  | -2.513950 |
| 98.0  | -7.015058  | 7.709931  | -1.812675 |
| 99.0  | -6.639765  | 8.829890  | -0.941041 |
| 100.0 | -5.140729  | 9.055185  | -1.046757 |
| 101.0 | -4.442224  | 7.897884  | -0.483972 |
| 102.0 | -4.586852  | 9.253246  | -2.485092 |
| 103.0 | -3.659410  | 10.354451 | -2.574096 |
| 104.0 | -3.930408  | 7.890350  | -2.818493 |
| 105.0 | -3.438108  | 7.440232  | -1.413725 |
| 106.0 | -3.266589  | 6.013348  | -1.240169 |
| 107.0 | -4.268152  | 5.042202  | -1.203039 |
| 108.0 | -3.774308  | 3.825044  | -1.102262 |
| 109.0 | -2.390721  | 3.982120  | -1.078094 |
| 110.0 | -1.353022  | 3.022082  | -0.950589 |
| 111.0 | -1.468626  | 1.776688  | -0.821853 |
| 112.0 | -0.077080  | 3.615439  | -0.962369 |
| 113.0 | 0.167840   | 4.971806  | -1.118816 |
| 114.0 | 1.448501   | 5.360063  | -1.206267 |
| 115.0 | -0.819326  | 5.880913  | -1.198723 |
| 116.0 | -2.050641  | 5.339647  | -1.169391 |
| 117.0 | -6.904774  | 8.584231  | 0.089924  |
| 118.0 | -7.178376  | 9.726574  | -1.261760 |
| 119.0 | -4.902138  | 9.939927  | -0.443585 |
| 120.0 | -5.376811  | 9.482619  | -3.202681 |
| 121.0 | -4.848512  | 6.973784  | -3.422048 |
| 122.0 | -3.092051  | 8.007560  | -3.507547 |
| 123.0 | -2.464387  | 7.899231  | -1.197115 |
| 124.0 | -5.316781  | 5.294044  | -1.219413 |
| 125.0 | 0.720095   | 2.951702  | -0.907689 |
| 126.0 | 2.254289   | 4.713748  | -1.118712 |
| 127.0 | 1.662325   | 6.350574  | -1.232660 |
| 128.0 | -7.013472  | -4.797493 | -3.430314 |
| 129.0 | -8.043508  | -3.036955 | -3.466685 |
| 130.0 | 10.440010  | -3.603142 | 2.526526  |
| 131.0 | -7.906217  | -2.459426 | -1.144979 |
| 132.0 | -5.304867  | -5.312969 | -1.235065 |
| 133.0 | -2.956070  | 0.720052  | -0.893383 |
| 134.0 | -4.719891  | 2.256297  | -0.086869 |
| 135.0 | -6.358975  | 1.664034  | -1.188938 |
| 136.0 | -5.068802  | -6.224743 | 1.110734  |
| 137.0 | -1.432583  | -7.367994 | 1.769278  |
| 138.0 | 10.284798  | 2.959678  | -1.800044 |
| 139.0 | -2.836743  | -1.066338 | 2.398500  |
| 140.0 | -5.051337  | -4.264935 | -1.210677 |
| 141.0 | -3.832606  | -3.772842 | -1.117882 |
| 142.0 | -3.988602  | -2.389177 | -1.081044 |



|        |            |            |           |
|--------|------------|------------|-----------|
| 143.C  | -3.027601  | -1.352373  | -0.950426 |
| 144.O  | -1.781610  | -1.468507  | -0.829238 |
| 145.N  | -5.368398  | 1.450769   | -1.163045 |
| 146.N  | -5.888500  | -0.816621  | -1.170564 |
| 147.C  | -5.346852  | -2.047856  | -1.156476 |
| 148.H  | -8.591180  | -6.925638  | 0.056056  |
| 149.H  | -5.188863  | -0.787238  | 2.217154  |
| 150.H  | -2.977779  | 10.263374  | -1.882288 |
| 151.H  | -6.163171  | -2.233204  | 2.022378  |
| 152.P  | -6.857375  | -8.349083  | -1.626826 |
| 153.O  | -7.687387  | -9.608549  | -1.759749 |
| 154.O  | -5.662946  | -8.261050  | -2.573853 |
| 155.O  | -7.728253  | -6.993845  | -1.853524 |
| 156.C  | -8.842267  | -6.636702  | -0.966979 |
| 157.N  | -3.620994  | -0.076229  | -0.948327 |
| 158.Na | -10.438888 | 6.305556   | -3.477086 |
| 159.C  | -9.065911  | -5.135266  | -1.036834 |
| 160.O  | -7.899429  | -4.451508  | -0.474135 |
| 161.C  | -9.280803  | -4.549687  | -2.460121 |
| 162.C  | 6.897912   | -4.260745  | 1.472730  |
| 163.N  | 5.287926   | -1.060152  | 2.155846  |
| 164.C  | 4.219069   | -1.954595  | 2.210528  |
| 165.H  | 2.464387   | -7.899231  | -1.197115 |
| 166.C  | 2.821807   | -1.734971  | 2.350811  |
| 167.H  | 9.997506   | -5.162721  | 3.861213  |
| 168.H  | 10.953128  | -5.582383  | 2.419219  |
| 169.H  | 8.687910   | -6.512271  | 2.285987  |
| 170.H  | 8.565872   | -3.123352  | 0.702514  |
| 171.O  | 7.382924   | -3.710219  | -0.889453 |
| 172.H  | 6.227733   | -5.065890  | 1.151434  |
| 173.H  | 7.365137   | -1.427235  | 1.814891  |
| 174.O  | -3.624960  | -10.451557 | 2.463162  |
| 175.H  | 4.902138   | -9.939927  | -0.443585 |
| 176.H  | -0.720095  | -2.951702  | -0.907689 |
| 177.H  | 1.059255   | -2.833823  | 2.396071  |
| 178.H  | 0.782016   | -5.185759  | 2.195489  |
| 179.H  | 2.230151   | -6.157530  | 2.010160  |
| 180.P  | 8.380428   | -6.859783  | -1.567421 |
| 181.O  | 9.627793   | -7.710292  | -1.685058 |
| 182.O  | 8.323891   | -5.663102  | -2.513950 |
| 183.N  | -2.942367  | -2.096739  | 2.316255  |
| 184.O  | 7.015058   | -7.709931  | -1.812675 |
| 185.C  | 6.639765   | -8.829890  | -0.941041 |
| 186.C  | 5.140729   | -9.055185  | -1.046757 |
| 187.O  | 4.442224   | -7.897884  | -0.483972 |
| 188.C  | 4.586852   | -9.253246  | -2.485092 |
| 189.O  | 3.659410   | -10.354451 | -2.574096 |
| 190.C  | 3.930408   | -7.890350  | -2.818493 |
| 191.O  | 8.117794   | -6.386351  | -0.031150 |
| 192.C  | -5.008407  | -10.115760 | 2.719167  |
| 193.N  | 0.819326   | -5.880913  | -1.198723 |
| 194.C  | -5.460770  | -8.841850  | 2.015476  |
| 195.O  | -4.698304  | -7.700323  | 2.557069  |
| 196.C  | 7.951356   | -3.975773  | 0.383571  |
| 197.C  | 3.438108   | -7.440232  | -1.413725 |
| 198.N  | 3.266589   | -6.013348  | -1.240169 |
| 199.C  | 4.268152   | -5.042202  | -1.203039 |
| 200.C  | -5.244822  | -8.808978  | 0.485775  |
| 201.H  | 9.817015   | -5.144611  | 0.110960  |
| 202.O  | -6.385971  | -8.097876  | -0.088136 |
| 203.C  | -3.977630  | -7.946437  | 0.338133  |
| 204.C  | -4.265740  | -6.897639  | 1.431461  |
| 205.N  | 3.774308   | -3.825044  | -1.102262 |
| 206.C  | -4.204466  | -2.649713  | 2.186366  |
| 207.N  | -5.264405  | -1.820587  | 2.240809  |
| 208.N  | -4.406078  | -3.964749  | 2.028381  |
| 209.C  | -3.271029  | -4.680012  | 2.009867  |
| 210.H  | -5.185496  | -10.009196 | 3.796973  |
| 211.C  | 2.390721   | -3.982120  | -1.078094 |
| 212.C  | 8.841980   | -5.447769  | 2.073670  |
| 213.O  | 7.694912   | -4.687012  | 2.604694  |
| 214.N  | -3.161197  | -6.051746  | 1.803546  |
| 215.C  | 8.818358   | -5.238780  | 0.542800  |
| 216.H  | -5.606542  | -10.953847 | 2.348428  |
| 217.O  | 3.624960   | 10.451557  | 2.463162  |
| 218.H  | -6.525592  | -8.685370  | 2.224219  |
| 219.C  | 5.008407   | 10.115760  | 2.719167  |
| 220.C  | 5.460770   | 8.841850   | 2.015476  |
| 221.O  | 4.698304   | 7.700323   | 2.557069  |
| 222.H  | -5.153865  | -9.805934  | 0.047122  |
| 223.C  | 5.244822   | 8.808978   | 0.485775  |
| 224.H  | -3.129526  | -8.565115  | 0.660020  |
| 225.H  | 2.977779   | -10.263374 | -1.882288 |
| 226.O  | 6.385971   | 8.097876   | -0.088136 |
| 227.C  | 3.988602   | 2.389177   | -1.081044 |
| 228.C  | 3.027601   | 1.352373   | -0.950426 |
| 229.O  | 1.781610   | 1.468507   | -0.829238 |
| 230.N  | 3.620994   | 0.076229   | -0.948327 |
| 231.C  | 4.978805   | -0.170030  | -1.091167 |
| 232.N  | 5.368398   | -1.450769  | -1.163045 |
| 233.N  | 5.888500   | 0.816621   | -1.170564 |
| 234.C  | 5.346852   | 2.047856   | -1.156476 |
| 235.H  | 8.591180   | 6.925638   | 0.056056  |
| 236.H  | 9.741428   | 7.166617   | -1.294973 |
| 237.H  | 9.942088   | 4.908343   | -0.416651 |
| 238.H  | 9.521867   | 5.323360   | -3.191473 |
| 239.O  | 7.013472   | 4.797493   | -3.430314 |
| 240.H  | 8.043508   | 3.036955   | -3.466685 |
| 241.H  | 7.906217   | 2.459426   | -1.144979 |
| 242.H  | 5.304867   | 5.312969   | -1.235065 |
| 243.H  | 2.956070   | -0.720052  | -0.893383 |
| 244.H  | 4.719891   | -2.256297  | -1.086869 |
| 245.H  | 6.358975   | -1.664034  | -1.188938 |
| 246.O  | -10.379837 | -3.616870  | -2.514563 |
| 247.C  | -7.920217  | -3.889943  | -2.796861 |
| 248.C  | -7.451568  | -3.428811  | -1.388065 |
| 249.C  | -4.978805  | 0.170030   | -1.091167 |
| 250.H  | -9.741428  | -7.166617  | -1.294973 |
| 251.H  | -9.942088  | -4.908343  | -0.416651 |
| 252.H  | -10.284798 | -2.959678  | -1.800044 |
| 253.C  | -1.802532  | -6.359649  | 1.889606  |
| 254.H  | -7.724127  | 4.369572   | -1.555793 |
| 255.N  | -6.022115  | -3.262503  | -1.228984 |
| 256.H  | 6.904774   | -8.584231  | 0.089924  |
| 257.H  | -9.521867  | -5.323360  | -3.191473 |
| 258.H  | 9.764835   | -3.058474  | 2.971349  |
| 259.H  | -9.764835  | 3.058474   | 2.971349  |
| 260.Na | -6.265643  | -10.373979 | -3.562554 |
| 261.N  | 3.161197   | 6.051746   | 1.803546  |

|        |           |           |           |
|--------|-----------|-----------|-----------|
| 262.C  | 6.356204  | -1.797650 | 1.928307  |
| 263.H  | 3.077607  | 9.782993  | 2.914563  |
| 264.Na | 10.438888 | -6.305556 | -3.477086 |
| 265.H  | 7.094188  | 5.669864  | -2.981151 |
| 266.H  | -5.713051 | 7.061541  | -2.959383 |
| 267.H  | -7.094188 | -5.669864 | -2.981151 |
| 268.H  | 5.713051  | -7.061541 | -2.959383 |
| 269.H  | -4.368747 | -7.692971 | -1.599804 |
| 270.H  | 7.724127  | -4.369572 | -1.555793 |
| 271.H  | 4.368747  | 7.692971  | -1.599804 |
| 272.Na | 6.265643  | 10.373979 | -3.562554 |
| 273.K  | 0.000000  | 0.000000  | 0.784802  |
